# Supplementary material for: Ancestry-informative markers for African Americans based on the Affymetrix Pan-African genotyping array
Source: PeerJ. 2014 Nov 4;2:e660. doi: 10.7717/peerj.660 (PMC4226639; doi:10.7717/peerj.660)
Supplement: Table S1 — Gen_Pos: genetic distance in cm; Phys_Pos: physical position in bp. [file peerj-02-660-s001.xlsx]

## Sheet: supplemental_table_sic
SNP_Id	Chr_Num	Gen_Pos	Phys_Pos	Afr_vart	Afr_ref	Eur_vart	Eur_ref
rs13303010	1	2.42133	894573	19	157	157	13
rs12729599	1	3.03808	1323078	3	173	143	27
rs2281173	1	3.52334	1688192	37	139	158	12
rs2254669	1	4.38256	2006108	161	15	36	134
rs2643899	1	4.71921	2266078	165	11	73	97
rs897634	1	5.4521	2835692	156	20	46	124
rs2817147	1	6.47255	3137199	171	5	44	126
rs2298082	1	7.45672	3389273	50	126	141	29
rs6687491	1	8.53921	3641026	13	163	136	34
rs7548756	1	9.84756	4170249	156	20	41	129
rs2076883	1	10.9187	4583294	4	172	80	90
rs10799149	1	12.0871	5031379	169	7	72	98
rs622682	1	13.0091	5344779	160	16	59	111
rs12091928	1	14.4282	5721189	130	46	1	169
rs11120772	1	15.3414	5973775	51	125	85	85
rs58749332	1	15.8141	6229254	146	30	23	147
rs2986742	1	16.1953	6550376	152	24	18	152
rs660880	1	16.5001	6866978	21	155	91	79
rs763196	1	16.9613	7280360	116	60	1	169
rs58167413	1	18.0907	7705997	139	37	14	156
rs161826	1	18.4675	7980338	119	57	3	167
rs66504733	1	19.0777	8395122	21	155	95	75
rs6697763	1	19.5312	9037273	161	15	57	113
rs9435227	1	20.454	9382140	123	53	2	168
rs12047054	1	21.458	9814964	142	34	8	162
rs3003376	1	21.7292	10071301	150	26	22	148
rs284235	1	21.9795	10678843	77	99	20	150
rs6690924	1	23.0351	10935265	150	26	7	163
rs2300091	1	23.6666	11266711	9	167	122	48
rs2817582	1	24.0681	11625644	167	9	30	140
rs873458	1	25.1338	12046089	6	170	84	86
rs374450	1	26.1528	12305286	136	40	24	146
rs6691399	1	26.571	12683017	48	128	146	24
rs2179303	1	27.3138	13186398	24	152	96	74
rs2999896	1	28.4268	13825195	167	9	65	105
rs12086572	1	29.6104	14225373	91	85	11	159
rs1856740	1	30.1567	14481281	165	11	84	86
rs74058927	1	31.3241	14973245	95	81	1	169
rs10803326	1	32.3331	15272745	156	20	21	149
rs2496325	1	33.8452	15739016	174	2	58	112
rs76368983	1	34.1981	16124276	77	99	13	157
rs11260721	1	34.5889	16455052	31	145	156	14
rs9439632	1	34.9559	16830833	22	154	84	86
rs2454165	1	35.7795	17488709	97	79	1	169
rs7533356	1	36.6978	17795888	26	150	7	163
rs1572790	1	37.3948	18063132	139	37	32	138
rs1192609	1	37.9542	18313317	21	155	31	139
rs4920466	1	38.8128	18565897	10	166	151	19
rs9439714	1	40.1737	18976489	6	170	75	95
rs28710799	1	41.8925	19350136	136	40	37	133
rs4529730	1	42.3633	19871134	5	171	108	62
rs818965	1	43.2962	20250525	84	92	168	2
rs12409350	1	43.9728	20510681	122	54	33	137
rs10916800	1	44.6058	20773115	30	146	65	105
rs875016	1	45.1095	21033779	5	171	103	67
rs2317292	1	45.3769	21734235	26	150	131	39
rs829420	1	45.8737	22013561	84	92	140	30
rs10917067	1	46.1295	22265293	6	170	102	68
rs4589080	1	46.5413	22636808	8	168	96	74
rs649754	1	47.1489	22906247	125	51	41	129
rs10917321	1	47.7641	23200293	34	142	164	6
rs10753556	1	48.0331	23732762	13	163	155	15
rs1320320	1	48.5079	24002974	15	161	91	79
rs6424166	1	49.1762	24552117	158	18	57	113
rs9424374	1	49.4881	24822500	160	16	29	141
rs419655	1	50.1407	25312962	172	4	56	114
rs2375313	1	50.7718	25748235	28	148	91	79
rs2982313	1	51.1198	25999517	163	13	40	130
rs11247854	1	51.4652	26399230	25	151	128	42
rs17162257	1	51.9509	26929002	122	54	3	167
rs1292074	1	52.5575	27974394	134	42	5	165
rs11587757	1	52.9903	28740421	6	170	67	103
rs4428852	1	53.2505	29607279	2	174	110	60
rs7537024	1	53.944	29859210	120	56	50	120
rs9658994	1	54.4751	30178435	156	20	63	107
rs1009080	1	54.9025	30431560	12	164	115	55
rs456809	1	55.3833	30731255	146	30	40	130
rs1874746	1	55.9642	30987686	24	152	141	29
rs72882075	1	57.0706	31357700	130	46	35	135
rs4949198	1	57.3434	31681614	14	162	130	40
rs4949447	1	57.6327	32057186	14	162	124	46
rs669538	1	57.9778	32711360	171	5	44	126
rs84314	1	58.4171	33595212	171	5	80	90
rs1318411	1	58.7627	34023779	34	142	84	86
rs10798995	1	59.5501	34281443	174	2	105	65
rs2994598	1	60.5858	34653278	138	38	33	137
rs10914958	1	61.1084	34943763	157	19	51	119
rs1741971	1	61.5261	35217966	164	12	58	112
rs11264110	1	62.228	35636227	4	172	156	14
rs74064504	1	62.4967	36669372	111	65	4	166
rs61367738	1	62.7788	36971863	141	35	15	155
rs504383	1	63.4515	37254662	174	2	53	117
rs12137564	1	64.587	37555119	9	167	92	78
rs12568458	1	64.8833	37820973	25	151	93	77
rs12732675	1	65.1559	38135687	19	157	138	32
rs751693	1	65.598	38551315	126	50	29	141
rs6704425	1	66.4678	38875991	120	56	1	169
rs56211957	1	67.2803	39139088	86	90	5	165
rs6656771	1	67.7665	39396070	3	173	111	59
rs6656934	1	68.1028	39966718	63	113	155	15
rs10889095	1	68.7454	40442552	13	163	125	45
rs6677417	1	69.3882	40935870	2	174	54	116
rs11209015	1	69.7771	41315679	78	98	24	146
rs7539614	1	70.263	41831047	11	165	91	79
rs710235	1	70.7523	42202714	139	37	2	168
rs11210617	1	71.0076	42764188	7	169	90	80
rs841576	1	71.4637	43440476	168	8	77	93
rs607949	1	71.8429	43695708	29	147	150	20
rs4660761	1	72.1794	44440146	10	166	147	23
rs270762	1	72.9593	45029939	98	78	3	167
rs1267304	1	73.6368	46990426	33	143	134	36
rs10890437	1	74.0601	47461876	49	127	166	4
rs12732050	1	74.3743	47792363	3	173	67	103
rs2253702	1	74.7076	48059935	56	120	164	6
rs9660630	1	75.2645	48421627	5	171	106	64
rs1872279	1	76.2487	49214762	3	173	132	38
rs3009109	1	76.5174	50757885	44	132	143	27
rs12044739	1	76.9232	52828739	140	36	12	158
rs6588458	1	77.2303	53510975	153	23	19	151
rs2296758	1	78.0224	53972205	168	8	45	125
rs6660975	1	78.7013	54425204	147	29	24	146
rs2274664	1	78.9819	54704629	149	27	97	73
rs6698850	1	79.5866	54956323	8	168	107	63
rs7554991	1	80.3098	55208767	130	46	85	85
rs9887913	1	80.8164	55462380	104	72	3	167
rs7555182	1	81.4199	55774344	4	172	101	69
rs9436516	1	81.7032	56123166	130	46	6	164
rs7526613	1	81.9702	56421137	130	46	6	164
rs7515808	1	82.6027	56972400	19	157	130	40
rs17372114	1	83.1022	57243454	8	168	75	95
rs563921	1	83.9209	57602383	161	15	33	137
rs56205269	1	84.3227	57891108	84	92	4	166
rs3126019	1	84.5751	58162855	157	19	43	127
rs1857373	1	85.0097	58420835	103	73	151	19
rs7550775	1	85.3276	58685010	3	173	121	49
rs2760501	1	86.1094	59251097	161	15	9	161
rs4622084	1	86.7488	59528844	10	166	85	85
rs12133535	1	87.1753	59890409	35	141	140	30
rs1207939	1	87.5879	60209170	113	63	25	145
rs34594413	1	87.983	60504651	1	175	33	137
rs4523542	1	88.2387	60996971	10	166	91	79
rs7514565	1	88.8148	61442276	172	4	33	137
rs2806429	1	89.4831	61760664	5	171	107	63
rs7544197	1	90.3456	62113102	100	76	169	1
rs1056513	1	91.1161	62380298	9	167	113	57
rs60367666	1	91.7086	62807409	93	83	1	169
rs1887587	1	92.0551	63201577	70	106	169	1
rs11208080	1	92.334	63452076	3	173	49	121
rs2031402	1	93.088	63744393	157	19	58	112
rs2284997	1	93.5469	64105775	166	10	79	91
rs855833	1	94.1533	64357432	24	152	160	10
rs7527017	1	94.598	64643277	4	172	70	100
rs2196537	1	95.0659	65014651	7	169	132	38
rs1048007	1	95.6223	65297240	170	6	66	104
rs12566696	1	95.9275	65608909	157	19	15	155
rs913199	1	96.2457	65871062	169	7	71	99
rs4313369	1	96.6307	66234139	138	38	20	150
rs699257	1	97.1834	66934229	5	171	91	79
rs2985809	1	97.7262	67372726	104	72	12	158
rs4655699	1	98.1927	67800712	7	169	93	77
rs678720	1	98.7119	68110761	170	6	43	127
rs2478149	1	99.1449	68532775	129	47	8	162
rs11209333	1	99.9231	69099017	156	20	30	140
rs2494922	1	100.187	69491160	124	52	6	164
rs12097103	1	100.497	69794383	121	55	7	163
rs12736836	1	100.862	70197401	95	81	3	167
rs12756379	1	101.669	71109380	4	172	98	72
rs12727814	1	102.072	72014193	10	166	133	37
rs11210034	1	102.696	73172614	1	175	125	45
rs1160782	1	103.083	74342400	4	172	77	93
rs6693806	1	103.348	74861767	7	169	121	49
rs10890141	1	103.833	75174146	11	165	94	76
rs718883	1	104.263	76065190	5	171	71	99
rs10493583	1	104.568	76570926	4	172	80	90
rs7553137	1	105.134	76936730	159	17	44	126
rs4268394	1	105.882	77295109	34	142	145	25
rs12565558	1	106.277	77828665	8	168	60	110
rs6424780	1	106.803	79056297	57	119	155	15
rs59695493	1	107.198	79339881	78	98	1	169
rs12097642	1	107.588	79714938	154	22	47	123
rs12123322	1	108.008	80650524	5	171	99	71
rs4607823	1	108.297	80912432	46	130	153	17
rs1342413	1	108.644	81178719	143	33	72	98
rs11163171	1	108.977	81440395	108	68	10	160
rs7524907	1	109.685	81867479	32	144	150	20
rs17106872	1	110.324	82120122	58	118	11	159
rs4970668	1	110.731	82574799	94	82	167	3
rs1690546	1	111.237	83030504	169	7	88	82
rs6668833	1	111.731	83473598	93	83	167	3
rs6696049	1	112.162	84081556	55	121	162	8
rs642774	1	112.907	84843465	72	104	150	20
rs818524	1	113.213	85201228	16	160	124	46
rs3013111	1	113.974	85649468	109	67	29	141
rs12742253	1	114.303	85970975	31	145	118	52
rs4912465	1	114.796	86605797	18	158	99	71
rs974843	1	115.226	87015179	165	11	55	115
rs10873830	1	116.015	87803200	26	150	145	25
rs1360480	1	116.691	88062926	26	150	131	39
rs1334337	1	117.227	88392532	170	6	68	102
rs10923038	1	117.852	88651771	3	173	111	59
rs12402131	1	118.238	89344300	104	72	8	162
rs641429	1	118.567	89749389	124	52	13	157
rs6688061	1	118.963	90266436	166	10	88	82
rs2813741	1	119.574	90537317	130	46	16	154
rs11578876	1	120.469	91281546	11	165	97	73
rs12134245	1	121.149	92021464	6	170	90	80
rs10493857	1	121.663	92334510	4	172	55	115
rs12043007	1	121.936	93472100	4	172	70	100
rs236307	1	122.205	94082917	168	8	23	147
rs3789375	1	122.61	94465132	139	37	20	150
rs1622451	1	123.19	94796141	92	84	12	158
rs6699528	1	123.564	95140173	70	106	162	8
rs7366121	1	124.254	95596496	9	167	107	63
rs1463974	1	124.625	96142780	4	172	120	50
rs290829	1	125.175	97451677	14	162	142	28
rs1413241	1	125.529	97722672	139	37	43	127
rs4271249	1	126.298	98398619	10	166	101	69
rs1408081	1	126.637	98774883	157	19	77	93
rs11166158	1	127.373	99499591	29	147	121	49
rs6682316	1	127.715	99835240	134	42	23	147
rs1389383	1	128.209	100274670	17	159	140	30
rs4243808	1	128.491	101077834	27	149	140	30
rs1188734	1	128.871	101457021	129	47	169	1
rs12134363	1	129.186	101711964	17	159	126	44
rs1385120	1	129.747	102177800	28	148	160	10
rs11404984	1	130.776	102745226	82	94	155	15
rs12138977	1	131.039	103393457	5	171	112	58
rs4847150	1	131.622	104478205	4	172	98	72
rs36010840	1	132.477	105428856	32	144	112	58
rs1721556	1	132.74	106081420	25	151	126	44
rs61816452	1	132.999	106372466	6	170	53	117
rs6687440	1	133.514	106770110	162	14	51	119
rs4256842	1	133.758	107163979	5	171	118	52
rs3120163	1	134.153	107650172	2	174	115	55
rs11185102	1	135.062	107926050	20	156	89	81
rs56188737	1	135.595	108228881	6	170	53	117
rs1350629	1	136.059	108527281	7	169	100	70
rs914807	1	136.477	109260034	69	107	159	11
rs3736956	1	137.095	109743622	2	174	91	79
rs501163	1	137.478	110078434	151	25	36	134
rs488028	1	138.175	110366265	122	54	10	160
rs512079	1	139.013	110761020	10	166	100	70
rs11102121	1	139.378	111015039	11	165	100	70
rs1282334	1	140.426	111567469	163	13	89	81
rs7552795	1	140.957	111929780	160	16	68	102
rs2365669	1	141.678	112362645	10	166	115	55
rs269140	1	142.109	112621408	102	74	21	149
rs6678502	1	142.461	112874469	131	45	12	158
rs7535706	1	143.034	113346108	19	157	83	87
rs1216899	1	143.332	113751640	51	125	153	17
rs12026423	1	143.736	114078037	44	132	134	36
rs12072102	1	143.987	114621340	13	163	8	162
rs642746	1	144.727	114873168	110	66	11	159
rs6657296	1	145.27	115737280	134	42	18	152
rs10924005	1	146.004	116153241	33	143	166	4
rs1281745	1	146.424	116608903	15	161	130	40
rs6660743	1	146.802	116949306	171	5	8	162
rs798006	1	147.576	117345188	156	20	7	163
rs1567699	1	148.272	117768020	23	153	151	19
rs1078547	1	148.633	118116303	52	124	128	42
rs7514644	1	148.921	118749926	11	165	103	67
rs2712278	1	149.297	119234256	124	52	10	160
rs7524361	1	149.725	119998093	132	44	4	166
rs835574	1	150.386	120463230	172	4	20	150
rs75313644	1	150.834	142692818	36	140	126	44
rs11261224	1	153.666	144525236	17	159	101	69
rs28653495	1	154.284	145092966	162	14	58	112
rs704984	1	154.816	145471191	32	144	165	5
rs34955113	1	155.46	145826770	27	149	101	69
rs1442758	1	157.154	146625193	168	8	69	101
rs11240089	1	157.473	147060514	16	160	154	16
rs1532399	1	157.763	147381444	56	120	123	47
rs543163	1	159.366	147826275	18	158	138	32
rs146080919	1	160.001	148544983	55	121	6	164
rs12044094	1	160.911	149149609	21	155	52	118
rs55803744	1	161.172	149674792	43	133	119	51
rs3118123	1	161.982	150163390	131	45	1	169
rs10127622	1	162.367	151468060	36	140	149	21
rs6683485	1	162.618	151817405	56	120	146	24
rs1984725	1	162.876	152473262	137	39	5	165
rs4845490	1	163.14	152849299	141	35	10	160
rs12145115	1	163.427	153179923	163	13	75	95
rs9660389	1	164.14	153582067	128	48	10	160
rs4074436	1	164.505	154531910	17	159	152	18
rs2878412	1	165.621	154828160	25	151	132	38
rs569025	1	165.951	156103997	132	44	14	156
rs11576266	1	166.543	156572159	6	170	122	48
rs2768744	1	167.458	156872149	10	166	144	26
rs11264673	1	168.02	157279122	172	4	60	110
rs849830	1	168.423	157534853	169	7	66	104
rs6427413	1	168.716	157941545	140	36	71	99
rs429201	1	169.398	158194899	27	149	139	31
rs857691	1	169.652	158626378	149	27	50	120
rs861319	1	170.198	158915917	44	132	142	28
rs55872368	1	170.639	159176856	160	16	20	150
rs2494493	1	171.41	159810240	123	53	16	154
rs617599	1	172.501	160162959	2	174	63	107
rs12134393	1	172.849	160512224	46	130	159	11
rs11265498	1	173.539	160828285	141	35	31	139
rs55839314	1	173.962	161329682	64	112	7	163
rs2340727	1	174.409	161946727	156	20	19	151
rs4431825	1	174.902	162210471	3	173	91	79
rs7513662	1	175.519	162480145	4	172	60	110
rs12124253	1	175.771	162862846	4	172	123	47
rs10917691	1	176.185	163142537	3	173	70	100
rs12737844	1	176.779	163499997	59	117	155	15
rs781946	1	177.258	163815371	70	106	164	6
rs4657349	1	177.586	164120219	51	125	144	26
rs1387390	1	178.798	164628310	25	151	131	39
rs4657391	1	179.662	164993587	25	151	143	27
rs4657431	1	180.136	165246826	49	127	105	65
rs722259	1	180.756	165530913	10	166	105	65
rs6426942	1	181.037	165825166	86	90	162	8
rs4342826	1	181.453	166302197	113	63	8	162
rs10918585	1	182.086	166822183	167	9	90	80
rs1359059	1	182.632	167234166	6	170	88	82
rs1723012	1	183.176	167485375	110	66	3	167
rs34412860	1	184.197	167755385	164	12	119	51
rs3753935	1	184.471	168153801	161	15	41	129
rs1407955	1	185.272	168405206	110	66	3	167
rs2223479	1	186.04	168743952	133	43	34	136
rs1040503	1	186.573	169086221	144	32	61	109
rs6135	1	186.917	169566326	116	60	19	151
rs12129877	1	187.433	170222552	12	164	91	79
rs7892078	1	187.952	170995055	122	54	25	145
rs7549726	1	188.743	171409515	169	7	49	121
rs7525638	1	189.042	171955918	146	30	31	139
rs2301455	1	189.304	172418268	6	170	106	64
rs6688532	1	189.725	172892952	170	6	64	106
rs3861950	1	190.049	173156292	159	17	49	121
rs7413166	1	190.41	173929735	164	12	34	136
rs859452	1	191.102	175424786	101	75	3	167
rs10798415	1	191.79	175724078	146	30	21	149
rs813180	1	192.125	176166142	4	172	55	115
rs10798473	1	192.643	176646383	173	3	84	86
rs2902095	1	193.016	177156357	138	38	12	158
rs3117758	1	193.429	177716739	47	129	152	18
rs4652291	1	194.049	178028711	170	6	27	143
rs9803716	1	194.645	178952468	92	84	1	169
rs6666456	1	194.9	179518799	17	159	87	83
rs11589519	1	195.231	180122390	8	168	110	60
rs7543366	1	195.734	180506038	17	159	104	66
rs7524675	1	196.269	181102079	34	142	130	40
rs591650	1	196.992	181384078	119	57	10	160
rs3766979	1	197.515	181636598	22	154	104	66
rs2494449	1	197.962	182272989	24	152	125	45
rs3856123	1	198.644	182756294	113	63	2	168
rs10911339	1	198.992	183442097	4	172	62	108
rs6698088	1	199.627	183958442	167	9	34	136
rs6678278	1	199.946	184410702	167	9	29	141
rs234682	1	200.225	184890621	117	59	13	157
rs12046623	1	200.813	185508531	169	7	68	102
rs1555494	1	201.13	185886151	135	41	1	169
rs17526478	1	201.799	186851157	5	171	110	60
rs1496106	1	202.261	187250330	170	6	87	83
rs3127499	1	202.605	187659348	29	147	116	54
rs1159069	1	203.081	187912258	30	146	139	31
rs6704072	1	203.789	189322373	132	44	5	165
rs10800800	1	204.357	189972603	173	3	57	113
rs613836	1	204.76	191433463	89	87	9	161
rs10921085	1	205.023	192092853	48	128	150	20
rs1923949	1	205.502	192547710	171	5	37	133
rs7530747	1	206.061	192857032	101	75	3	167
rs669027	1	206.707	193819826	19	157	140	30
rs3009334	1	207.252	194584118	167	9	43	127
rs2150899	1	207.659	195632382	10	166	127	43
rs1349566	1	207.933	195923203	132	44	8	162
rs1412631	1	208.563	197037237	35	141	158	12
rs6685420	1	209.166	197998163	150	26	14	156
rs2359851	1	209.49	198541652	14	162	99	71
rs9662783	1	209.85	199238445	116	60	10	160
rs2816949	1	210.365	199997778	158	18	33	137
rs6679648	1	211.014	200270585	40	136	1	169
rs6689232	1	211.339	200570660	4	172	74	96
rs10920079	1	211.597	200919370	123	53	7	163
rs1361903	1	212.314	201298834	10	166	144	26
rs674085	1	213.288	201588940	151	25	27	143
rs3820380	1	214.122	202096815	37	139	141	29
rs4520471	1	214.59	202564221	4	172	97	73
rs782810	1	214.955	202957351	28	148	144	26
rs10920609	1	215.696	203290132	11	165	127	43
rs12045866	1	216.69	203637079	40	136	152	18
rs10793750	1	217.232	203983872	30	146	117	53
rs11240725	1	217.931	204317084	33	143	151	19
rs10900423	1	218.404	204678203	22	154	151	19
rs4950978	1	219.24	205024573	168	8	37	133
rs1338624	1	219.549	205381940	25	151	118	52
rs823103	1	220.37	205658832	24	152	145	25
rs7555534	1	220.646	205908867	159	17	111	59
rs57713692	1	221.249	206317209	150	26	1	169
rs11118092	1	221.659	206656770	6	170	80	90
rs291102	1	222.365	207106478	149	27	4	166
rs17186848	1	222.858	207804883	23	153	92	78
rs547641	1	223.15	208156869	41	135	154	16
rs7519519	1	223.921	208529031	159	17	35	135
rs6670308	1	224.713	208828151	120	56	8	162
rs34952075	1	225.417	209270440	135	41	13	157
rs10863770	1	225.768	209611172	14	162	121	49
rs978754	1	226.758	210213891	118	58	1	169
rs12407099	1	227.021	210594335	3	173	41	129
rs9430044	1	227.657	210884699	129	47	8	162
rs3111257	1	228.113	211420319	159	17	76	94
rs61828246	1	228.631	211908260	13	163	86	84
rs17018845	1	228.899	212428605	122	54	7	163
rs3123539	1	229.164	212815715	50	126	149	21
rs1656021	1	229.655	213527588	9	167	117	53
rs12042287	1	230.428	213788283	23	153	123	47
rs701897	1	231.016	214058159	18	158	159	11
rs11120265	1	231.413	214358758	3	173	108	62
rs2666839	1	232.143	214816224	125	51	11	159
rs6656675	1	232.678	215277616	56	120	167	3
rs2488418	1	233.03	215929795	23	153	134	36
rs17026017	1	233.698	216246044	106	70	13	157
rs6604611	1	233.995	216655251	154	22	11	159
rs2813690	1	234.743	217041214	159	17	59	111
rs964347	1	235.682	217511930	129	47	1	169
rs6698407	1	236.147	217920250	22	154	106	64
rs683968	1	236.49	218333601	165	11	36	134
rs259469	1	237.269	218756119	3	173	68	102
rs619228	1	237.882	219122116	22	154	154	16
rs1415282	1	238.283	219842900	8	168	129	41
rs1337571	1	239.076	220747622	62	114	169	1
rs6699300	1	239.416	221205291	155	21	55	115
rs3010848	1	240.018	221945123	151	25	49	121
rs9441898	1	240.32	222338482	152	24	54	116
rs1909196	1	240.894	222786032	19	157	123	47
rs2795063	1	241.644	223466400	159	17	56	114
rs1153968	1	242.206	223938565	169	7	58	112
rs12137706	1	242.465	224245297	41	135	87	83
rs791512	1	242.72	224717613	140	36	28	142
rs2449287	1	242.997	225180194	163	13	19	151
rs57788983	1	243.343	225991944	107	69	3	167
rs17319408	1	244.302	227118912	162	14	76	94
rs1060295	1	244.553	227920061	171	5	99	71
rs2104436	1	244.811	228633794	143	33	1	169
rs10799494	1	245.096	229037587	14	162	120	50
rs422460	1	245.896	229359199	122	54	12	158
rs11800554	1	246.455	229611318	58	118	1	169
rs12070887	1	246.752	230012316	157	19	2	168
rs584751	1	247.236	230322747	167	9	63	107
rs12033367	1	247.792	230576338	23	153	5	165
rs2478523	1	248.307	230841509	160	16	53	117
rs9431662	1	249.006	231312199	162	14	53	117
rs17817356	1	249.477	231920221	6	170	77	93
rs12085703	1	250.32	232385909	126	50	3	167
rs814216	1	251.084	232678397	91	85	3	167
rs2644441	1	251.863	232982116	22	154	154	16
rs701185	1	252.31	233347986	164	12	58	112
rs10910229	1	253.426	233765598	116	60	4	166
rs4920229	1	253.706	234053070	4	172	54	116
rs7531501	1	254.156	234338303	165	11	16	154
rs823485	1	255.44	234671267	173	3	62	108
rs60469954	1	256.141	234935697	26	150	81	89
rs35565142	1	257.486	235190411	159	17	52	118
rs12059431	1	258.392	235771589	158	18	49	121
rs7545421	1	258.854	236092453	21	155	129	41
rs1925366	1	259.452	236357685	168	8	64	106
rs637489	1	259.801	236609529	7	169	102	68
rs10754583	1	261.139	236932396	5	171	120	50
rs2485579	1	262.306	237271632	8	168	141	29
rs7551196	1	262.936	237531393	77	99	30	140
rs616734	1	263.596	237784501	5	171	129	41
rs618451	1	264.405	238243608	58	118	164	6
rs12086648	1	264.707	238548667	119	57	5	165
rs12729311	1	265.505	238811516	3	173	70	100
rs1574985	1	265.768	239143179	12	164	113	57
rs4390163	1	266.296	239495889	3	173	68	102
rs6429140	1	266.628	239768800	3	173	133	37
rs7527677	1	267.321	240063711	136	40	8	162
rs4659570	1	268.269	240454546	171	5	89	81
rs7517193	1	269.287	240743004	157	19	33	137
rs12042312	1	270.204	241000790	21	155	95	75
rs28645739	1	270.942	241272653	158	18	33	137
rs10926507	1	271.956	241694414	8	168	123	47
rs4658573	1	273.338	242094314	37	139	130	40
rs12405776	1	274.246	242431557	90	86	4	166
rs12748137	1	275.032	242709335	19	157	111	59
rs2502338	1	275.712	243069808	144	32	2	168
rs4658401	1	276.084	243803979	3	173	125	45
rs73121444	1	276.382	244122235	139	37	7	163
rs488109	1	277.704	244428531	21	155	158	12
rs7544794	1	278.489	244724092	91	85	14	156
rs73127483	1	279.258	244980554	162	14	11	159
rs4281315	1	280.07	245240884	119	57	169	1
rs12091805	1	281.185	245532053	151	25	4	166
rs7527246	1	282.27	245816347	102	74	13	157
rs4390144	1	282.895	246103198	6	170	143	27
rs3129563	1	283.443	246698448	63	113	165	5
rs3007298	1	283.716	246980484	160	16	84	86
rs6426217	1	284.027	247251709	172	4	73	97
rs10802493	1	284.422	247554039	3	173	94	76
rs880143	1	284.934	247868113	172	4	50	120
rs7527770	1	285.398	248227201	20	156	142	28
rs1938162	1	285.952	248734649	138	38	19	151
rs4417119	1	286.258	249191732	156	20	6	164
rs12990903	2	0.0719689	193892	21	155	127	43
rs2724919	2	0.733575	573797	126	50	4	166
rs35843777	2	1.27111	1123937	8	168	75	95
rs9679635	2	1.5463	1398252	145	31	11	159
rs10180168	2	2.21901	1717859	121	55	9	161
rs12613177	2	2.59045	1994469	153	23	56	114
rs17039804	2	3.39554	2474666	147	29	22	148
rs4853950	2	4.88055	2943674	6	170	115	55
rs9309717	2	9.74671	3495078	172	4	42	128
rs35212224	2	10.4761	3922066	4	172	61	109
rs2313959	2	11.5832	4420099	15	161	111	59
rs2619192	2	12.0393	4700632	147	29	31	139
rs7577926	2	12.4909	4951850	61	115	28	142
rs13026271	2	14.207	5202295	5	171	131	39
rs792061	2	14.9717	5523127	10	166	143	27
rs2163025	2	16.3811	5991969	171	5	61	109
rs1852319	2	16.8051	6252585	149	27	22	148
rs57917309	2	17.5219	6638555	14	162	102	68
rs4669097	2	18.1068	6905974	170	6	56	114
rs59601286	2	19.1532	7237106	14	162	83	87
rs7582300	2	19.549	7525664	156	20	39	131
rs798443	2	20.6717	7968275	5	171	138	32
rs7580787	2	21.8099	8369744	130	46	19	151
rs1054765	2	23.4713	8811354	9	167	134	36
rs1344185	2	24.0307	9290324	147	29	8	162
rs11674625	2	24.5478	9543221	134	42	24	146
rs6712680	2	24.9804	9798106	135	41	9	161
rs2357391	2	25.7327	10061592	17	159	111	59
rs72788354	2	26.4634	10332503	3	173	89	81
rs1728152	2	27.5326	10618576	91	85	1	169
rs11901664	2	28.1108	10929317	126	50	11	159
rs6432174	2	29.6057	11274019	129	47	4	166
rs10929735	2	30.052	11546173	28	148	129	41
rs58914318	2	31.1578	11885177	127	49	1	169
rs4669798	2	31.8409	12182170	24	152	137	33
rs6738906	2	32.2984	12527254	131	45	27	143
rs35855677	2	33.0155	12786284	3	173	105	65
rs779346	2	33.3845	13118962	31	145	109	61
rs311992	2	33.6478	13492068	13	163	154	16
rs7421057	2	34.0607	13743975	13	163	132	38
rs10495620	2	34.4135	14116991	146	30	11	159
rs7421394	2	35.0812	14756349	172	4	50	120
rs4668431	2	35.568	15227430	160	16	39	131
rs2031011	2	35.8571	15548390	27	149	128	42
rs6733850	2	36.3597	15930951	17	159	143	27
rs62118719	2	37.4598	16252019	2	174	71	99
rs11680058	2	38.3804	16574669	28	148	149	21
rs810066	2	38.9805	16889372	171	5	24	146
rs4324324	2	39.3832	17140637	114	62	168	2
rs6731077	2	39.8738	18007114	8	168	87	83
rs11676404	2	40.4159	18369571	22	154	137	33
rs9808546	2	40.6699	18621953	144	32	21	149
rs12472380	2	41.4227	19075323	13	163	121	49
rs1727177	2	41.6938	19492579	164	12	110	60
rs12479063	2	42.0569	19769507	18	158	98	72
rs12614891	2	42.4821	20055440	127	49	7	163
rs973129	2	42.8334	20332942	172	4	115	55
rs4666430	2	43.9734	20778459	17	159	142	28
rs340602	2	44.5666	21030979	110	66	3	167
rs10865249	2	44.9561	21481092	14	162	135	35
rs6751535	2	45.4998	21885924	129	47	9	161
rs12373752	2	45.9494	22515568	9	167	82	88
rs4665518	2	46.2301	23020557	137	39	28	142
rs13429604	2	47.1744	23374636	89	87	5	165
rs4665614	2	47.9452	23802390	14	162	115	55
rs17046057	2	48.2077	24295684	76	100	3	167
rs2119997	2	48.5136	24692639	29	147	139	31
rs6546148	2	48.8972	25625005	159	17	39	131
rs6706373	2	49.2321	26202280	169	7	91	79
rs13025681	2	49.6188	26748504	14	162	129	41
rs11693052	2	50.2086	27484620	158	18	46	124
rs9711355	2	51.0282	28718546	47	129	144	26
rs12714251	2	51.584	29218411	39	137	130	40
rs4666200	2	52.1907	29538411	20	156	127	43
rs2631941	2	52.7561	29981286	12	164	153	17
rs12617182	2	53.2186	30259921	60	116	162	8
rs10865519	2	53.9301	30555728	33	143	109	61
rs7580416	2	54.6609	30976168	120	56	3	167
rs6706156	2	55.6753	31380955	19	157	127	43
rs4141419	2	56.474	31772441	90	86	10	160
rs219076	2	56.9308	33280234	54	122	163	7
rs6708335	2	57.2431	33530845	57	119	5	165
rs6742257	2	58.1558	33790330	136	40	30	140
rs4670302	2	58.6746	34068392	33	143	149	21
rs249099	2	59.3084	34523233	33	143	122	48
rs1220226	2	59.6269	34805829	148	28	15	155
rs11124406	2	60.0192	35190105	153	23	15	155
rs2139115	2	60.6239	35952400	145	31	20	150
rs12712481	2	61.0354	36294364	4	172	100	70
rs6752813	2	61.5178	36574673	167	9	50	120
rs11689619	2	62.2371	36969712	11	165	145	25
rs2540998	2	62.5839	37255015	168	8	87	83
rs4670719	2	62.9082	37669487	157	19	43	127
rs1430032	2	63.9611	38027056	40	136	154	16
rs17022085	2	64.5651	38356620	148	28	5	165
rs6544163	2	64.8919	38651073	165	11	48	122
rs10203995	2	65.3865	39165054	15	161	151	19
rs4670985	2	65.9146	40140529	36	140	167	3
rs2192768	2	66.4631	40525932	163	13	60	110
rs11124754	2	66.9176	40876113	53	123	157	13
rs13385952	2	67.3613	41531398	161	15	26	144
rs2374384	2	68.181	42180657	98	78	1	169
rs13424316	2	68.7699	42959178	171	5	74	96
rs6754233	2	69.2723	43309992	88	88	1	169
rs4953014	2	70.0731	44007127	166	10	54	116
rs11896122	2	70.3956	44260828	154	22	45	125
rs12470084	2	70.8215	44534321	6	170	103	67
rs7557809	2	71.2571	45128120	139	37	20	150
rs10204473	2	72.2328	45492633	163	13	56	114
rs67687878	2	72.6469	45754242	37	139	73	97
rs6760686	2	73.2154	46009535	155	21	19	151
rs3754576	2	74.095	46326058	9	167	110	60
rs6735530	2	75.1107	46848446	133	43	12	158
rs2084194	2	75.5849	47117185	165	11	88	82
rs17557422	2	76.1388	47433968	162	14	41	129
rs10188090	2	76.6346	47709153	161	15	67	103
rs3136329	2	77.3443	48024876	161	15	98	72
rs17037566	2	77.6667	48940073	97	79	3	167
rs1316521	2	78.2602	49240142	39	137	141	29
rs1568287	2	78.7793	49909547	145	31	26	144
rs985919	2	79.2763	50687013	168	8	54	116
rs17041095	2	79.9581	51127789	118	58	21	149
rs4146703	2	80.3908	51909753	49	127	147	23
rs62140816	2	80.7722	52489021	4	172	103	67
rs9309231	2	81.0997	52749459	67	109	6	164
rs13432313	2	81.3594	53220996	155	21	41	129
rs1357204	2	82.1602	53609363	149	27	23	147
rs57113434	2	82.9147	54406341	94	82	7	163
rs354211	2	83.2963	54932516	168	8	54	116
rs1047948	2	83.6205	55517491	5	171	99	71
rs7608756	2	83.9752	56161538	141	35	42	128
rs214043	2	84.4935	56502322	29	147	113	57
rs1559011	2	84.8656	56933487	118	58	1	169
rs59309072	2	85.4107	58241694	159	17	27	143
rs7570921	2	85.9671	59207605	123	53	20	150
rs4672289	2	86.534	59644487	7	169	92	78
rs10164411	2	86.9734	60277059	170	6	87	83
rs7567242	2	87.4157	60553143	118	58	9	161
rs4643526	2	87.9335	61184651	159	17	32	138
rs62179401	2	88.4758	62607544	5	171	93	77
rs6730262	2	88.9741	64367694	173	3	88	82
rs7604158	2	89.5976	64771602	165	11	52	118
rs9678117	2	90.2355	65097855	33	143	144	26
rs6743585	2	90.8358	65555720	145	31	21	149
rs11695927	2	91.2482	65823020	136	40	22	148
rs6715761	2	91.7397	66097500	160	16	35	135
rs6759888	2	92.2269	66608569	167	9	50	120
rs10490190	2	92.7109	66902938	9	167	97	73
rs7569940	2	93.3051	67262414	73	103	16	154
rs11900586	2	93.6435	67513152	122	54	26	144
rs4671831	2	93.9368	67917864	1	175	72	98
rs7559887	2	94.8836	68268706	132	44	29	141
rs17035342	2	95.198	68579017	112	64	18	152
rs10174331	2	95.5175	68957329	147	29	40	130
rs12468876	2	96.2264	69244567	168	8	30	140
rs6738707	2	96.7331	69613958	173	3	102	68
rs2706768	2	97.0411	70456586	172	4	59	111
rs7562947	2	97.3986	70758123	106	70	13	157
rs72897942	2	98.3204	71194556	131	45	5	165
rs2287326	2	98.7121	71559107	6	170	99	71
rs12616254	2	99.4585	71969854	147	29	27	143
rs7601186	2	99.948	72306479	157	19	64	106
rs689154	2	100.298	72654662	172	4	36	134
rs72918382	2	100.597	73188754	112	64	4	166
rs2421555	2	101.117	73816955	163	13	44	126
rs828869	2	101.679	74323500	5	171	103	67
rs2268421	2	102.029	74654087	171	5	25	145
rs4443023	2	102.628	75123170	17	159	144	26
rs980545	2	103.196	75460060	145	31	10	160
rs9989869	2	104.111	76020813	167	9	58	112
rs34682890	2	104.367	76599621	31	145	123	47
rs13417876	2	104.839	76892452	169	7	63	107
rs10174161	2	105.386	77311875	168	8	46	124
rs13027105	2	105.783	77571568	11	165	114	56
rs17595520	2	106.483	77933509	10	166	80	90
rs17566368	2	107.017	78516288	161	15	29	141
rs17586318	2	107.285	79038224	21	155	97	73
rs62160280	2	107.898	79377931	162	14	43	127
rs1451542	2	108.31	79660530	166	10	97	73
rs4284854	2	108.816	80025940	165	11	44	126
rs1900264	2	109.873	80354170	165	11	58	112
rs1444543	2	110.168	80673614	170	6	37	133
rs11682678	2	110.562	80926385	170	6	79	91
rs1595070	2	110.918	81607703	149	27	108	62
rs6743623	2	111.251	82487155	152	24	17	153
rs12714111	2	111.762	84069630	53	123	150	20
rs4538216	2	112.078	84421955	3	173	131	39
rs6709476	2	112.898	85443924	138	38	11	159
rs10206961	2	113.249	85814984	167	9	67	103
rs1025104	2	113.869	86350664	9	167	143	27
rs12621901	2	114.195	87105444	158	18	78	92
rs56021413	2	114.846	87885695	24	152	88	82
rs143309967	2	116.127	88235088	137	39	41	129
rs1258411	2	116.819	88618096	167	9	50	120
rs55841791	2	117.351	89221850	114	62	34	136
rs2555958	2	118.288	90065400	27	149	113	57
rs1320149	2	118.556	97493877	152	24	17	153
rs12620005	2	118.807	98674129	100	76	12	158
rs744145	2	119.375	100190049	161	15	21	149
rs3791358	2	119.773	101031865	126	50	6	164
rs6757599	2	120.207	101422186	148	28	29	141
rs6543042	2	120.726	102032171	46	130	145	25
rs11413247	2	121.005	102399670	134	42	11	159
rs10181548	2	121.993	103712795	117	59	4	166
rs67881017	2	122.457	104490982	172	4	57	113
rs13011663	2	122.753	104890117	5	171	133	37
rs1866557	2	123.212	105237863	46	130	157	13
rs10203908	2	123.591	105591032	143	33	101	69
rs11695535	2	123.898	105860958	3	173	61	109
rs7592089	2	125.062	106254249	82	94	6	164
rs17721404	2	125.361	106550301	5	171	78	92
rs4234103	2	125.745	106974619	22	154	110	60
rs1404140	2	126.181	107535429	131	45	26	144
rs6755570	2	126.575	107931902	19	157	120	50
rs700852	2	126.883	108352847	161	15	19	151
rs11689841	2	127.376	108925572	3	173	78	92
rs260699	2	127.807	109567445	148	28	16	154
rs9677641	2	128.137	109819824	4	172	97	73
rs56800383	2	128.395	110103065	37	139	12	158
rs10496434	2	128.831	110381572	16	160	119	51
rs2004273	2	130.119	110855123	54	122	162	8
rs13426054	2	130.668	111477966	120	56	3	167
rs616084	2	130.978	111912715	157	19	95	75
rs2084425	2	131.953	112399098	2	174	92	78
rs34787974	2	132.366	112650905	12	164	31	139
rs719667	2	132.616	113342682	8	168	100	70
rs13023868	2	132.981	113682621	31	145	155	15
rs35222158	2	133.329	113986629	1	175	48	122
rs11123222	2	133.921	114800662	7	169	124	46
rs6745105	2	134.817	115605265	126	50	19	151
rs13032725	2	135.07	116350618	3	173	110	60
rs4289208	2	135.331	116737687	127	49	10	160
rs13006680	2	135.668	117404600	4	172	70	100
rs332907	2	135.942	117858594	3	173	104	66
rs2113512	2	136.26	118432736	14	162	103	67
rs3860421	2	136.551	118960711	39	137	167	3
rs13023588	2	137.724	119826093	56	120	150	20
rs2587701	2	138.164	120231165	32	144	148	22
rs2292361	2	138.44	120689905	44	132	125	45
rs874816	2	139.311	121264471	33	143	158	12
rs7569100	2	140.073	121554317	143	33	10	160
rs13404741	2	140.921	121831765	175	1	34	136
rs192608	2	141.868	122392439	149	27	22	148
rs1949957	2	142.381	123262781	9	167	152	18
rs7575671	2	143.039	123786757	120	56	26	144
rs11123006	2	143.321	124496797	22	154	137	33
rs6727886	2	143.782	125179754	22	154	97	73
rs12612581	2	144.06	125459227	4	172	30	140
rs11687268	2	144.363	126312896	173	3	95	75
rs10175150	2	144.687	127335267	114	62	33	137
rs6733255	2	145.472	127662386	17	159	163	7
rs1367403	2	146.316	128372856	156	20	34	136
rs11686075	2	146.569	128844716	12	164	103	67
rs705056	2	147.243	129248602	156	20	17	153
rs2406389	2	147.869	129529282	150	26	53	117
rs1025819	2	148.541	130092701	17	159	163	7
rs4233595	2	148.804	130483910	42	134	159	11
rs2621999	2	149.348	130954662	167	9	59	111
rs2625051	2	149.613	131512850	165	11	20	150
rs13011826	2	150.195	131913894	6	170	115	55
rs4621214	2	150.932	132881416	128	48	18	152
rs3897803	2	151.361	133139362	164	12	72	98
rs7579800	2	152.088	133396489	150	26	1	169
rs971414	2	152.377	133682085	126	50	4	166
rs12691835	2	152.985	133958149	11	165	93	77
rs7586760	2	153.715	134410530	121	55	23	147
rs2321545	2	154.318	134772364	1	175	80	90
rs3791294	2	154.72	135119097	4	172	114	56
rs6736792	2	155.239	135572090	171	5	53	117
rs309137	2	155.562	136765951	172	4	40	130
rs12691889	2	156.266	137205495	10	166	125	45
rs4954466	2	156.724	137866726	31	145	147	23
rs7355522	2	157.021	138129626	44	132	168	2
rs13386748	2	157.392	138524107	6	170	133	37
rs10928640	2	157.7	138793328	27	149	81	89
rs4954933	2	157.975	139272634	5	171	113	57
rs11673949	2	158.674	139969870	175	1	102	68
rs2950607	2	159.181	140904795	8	168	103	67
rs10166217	2	159.7	141398489	27	149	114	56
rs10186572	2	159.961	141795269	12	164	103	67
rs11901499	2	160.45	142172028	127	49	9	161
rs13429414	2	161.043	142645135	7	169	85	85
rs6730965	2	161.628	143292355	172	4	29	141
rs12691673	2	162.207	144092133	48	128	156	14
rs10185955	2	162.738	144587692	3	173	80	90
rs1427297	2	163.269	145227458	18	158	125	45
rs7581734	2	163.96	146259114	42	134	153	17
rs13031120	2	164.394	146928706	20	156	141	29
rs4662260	2	164.666	147349378	35	141	141	29
rs6757820	2	165.187	148279693	29	147	148	22
rs1979038	2	165.617	149210898	27	149	151	19
rs4303665	2	166.001	149677671	48	128	151	19
rs7571890	2	166.477	150419893	22	154	135	35
rs11894267	2	166.943	151155568	50	126	162	8
rs1406242	2	167.637	151413170	8	168	97	73
rs6761863	2	168.071	151725382	31	145	154	16
rs13005624	2	168.455	152039589	2	174	93	77
rs6433569	2	168.739	152552062	2	174	135	35
rs1579050	2	169.075	153364527	25	151	121	49
rs10931434	2	169.451	153881453	24	152	146	24
rs4410241	2	169.804	154143853	5	171	82	88
rs13007548	2	170.327	154582564	9	167	110	60
rs9288336	2	170.832	155233688	8	168	80	90
rs2652436	2	171.258	155621836	60	116	156	14
rs1524909	2	171.511	156381959	3	173	63	107
rs298259	2	172.006	157324825	18	158	130	40
rs1481236	2	172.491	158097854	159	17	23	147
rs6437106	2	173.099	158410196	109	67	16	154
rs1866887	2	173.758	158747070	10	166	144	26
rs13432858	2	174.35	159063290	5	171	104	66
rs2711048	2	174.66	159587170	162	14	96	74
rs55676907	2	175.077	160159310	2	174	100	70
rs7573270	2	175.437	160949533	170	6	47	123
rs17705608	2	175.836	161991197	7	169	80	90
rs901303	2	176.382	163416447	158	18	8	162
rs10432459	2	176.711	163688455	18	158	104	66
rs1221527	2	176.985	164260838	159	17	14	156
rs11685485	2	177.574	164750764	7	169	124	46
rs6432798	2	177.891	165445468	134	42	28	142
rs13034434	2	178.167	165745035	31	145	149	21
rs6715470	2	179.309	167195172	156	20	55	115
rs7569219	2	179.579	167724389	173	3	47	123
rs11691034	2	180.323	168518206	48	128	163	7
rs7595310	2	180.604	168810137	153	23	26	144
rs4668060	2	180.893	169166305	52	124	157	13
rs11680688	2	181.236	169436023	6	170	139	31
rs10497348	2	181.618	169718301	107	69	7	163
rs4667591	2	182.192	170003432	19	157	134	36
rs62171296	2	182.936	170288854	8	168	113	57
rs908781	2	183.721	171127960	69	107	159	11
rs34020565	2	184.458	171380643	130	46	5	165
rs1477061	2	185.35	171683107	18	158	136	34
rs3731987	2	185.729	172193808	112	64	50	120
rs6738445	2	185.995	172599615	27	149	119	51
rs972957	2	186.282	172986576	91	85	16	154
rs7608333	2	186.744	173249050	154	22	45	125
rs55774730	2	187.039	173500035	36	140	4	166
rs2113807	2	187.29	173784658	8	168	123	47
rs11675433	2	188.047	174223675	4	172	65	105
rs11694866	2	189.209	174522944	3	173	117	53
rs59924914	2	189.639	174850063	97	79	12	158
rs60234671	2	190.07	175195860	122	54	11	159
rs1376865	2	190.594	175624597	40	136	147	23
rs2461773	2	190.902	176271521	94	82	2	168
rs73043981	2	191.283	176747664	50	126	3	167
rs12992285	2	191.535	177073853	9	167	101	69
rs2197801	2	192.321	177451264	7	169	98	72
rs1113669	2	192.945	177839636	8	168	117	53
rs1527401	2	193.313	178522104	14	162	126	44
rs12619532	2	193.59	178953409	13	163	99	71
rs1158872	2	194.059	180127703	156	20	43	127
rs17767681	2	194.807	180464557	5	171	72	98
rs7570635	2	195.35	180787226	22	154	114	56
rs6705354	2	195.68	181272873	61	115	149	21
rs13414852	2	196.209	181823924	5	171	59	111
rs2583015	2	196.724	182555552	107	69	2	168
rs10931002	2	197.148	183174630	2	174	85	85
rs1530056	2	197.479	183694845	13	163	91	79
rs1622455	2	197.96	184298771	63	113	169	1
rs1372950	2	198.505	185256366	3	173	93	77
rs7583540	2	198.822	185834395	5	171	103	67
rs4667193	2	199.554	188626214	14	162	130	40
rs7424137	2	200.16	189883644	8	168	122	48
rs1233297	2	200.46	190694175	168	8	39	131
rs6720569	2	200.789	191035833	7	169	83	87
rs17815942	2	201.2	191813539	4	172	105	65
rs7556924	2	201.615	192081432	114	62	8	162
rs7592348	2	201.895	192338718	27	149	161	9
rs6710083	2	203.025	192772592	157	19	10	160
rs62179698	2	203.854	193186103	57	119	156	14
rs10931582	2	204.238	193804116	9	167	89	81
rs11685885	2	204.789	195148075	28	148	113	57
rs891522	2	205.264	195828622	13	163	147	23
rs13019896	2	205.667	196210476	42	134	158	12
rs3748875	2	206.012	197065179	5	171	122	48
rs13011223	2	206.727	197624291	7	169	122	48
rs10931819	2	207.834	199475972	44	132	160	10
rs12614240	2	208.193	199753674	7	169	86	84
rs11685147	2	208.45	200612911	28	148	153	17
rs2247030	2	208.861	201560605	22	154	136	34
rs700636	2	209.183	202153252	12	164	98	72
rs7595675	2	209.635	202799540	20	156	142	28
rs11888559	2	210.206	204165171	69	107	162	8
rs10932034	2	210.49	204812993	29	147	139	31
rs13418503	2	211.207	205117464	123	53	1	169
rs10203289	2	211.888	205731504	145	31	18	152
rs1207427	2	212.34	206152828	149	27	16	154
rs10932121	2	213.269	206479547	11	165	75	95
rs1362663	2	214.24	206769589	50	126	166	4
rs4673350	2	214.745	207178872	16	160	115	55
rs3828294	2	215.035	207629904	125	51	31	139
rs12466346	2	215.613	208120208	9	167	96	74
rs10932209	2	216.243	208671911	114	62	11	159
rs4675743	2	216.807	209087335	35	141	157	13
rs6435472	2	217.164	209587434	152	24	69	101
rs169636	2	217.516	210437478	163	13	19	151
rs13383683	2	218.037	211504372	138	38	14	156
rs2576617	2	218.357	211842557	122	54	39	131
rs13414946	2	218.774	212296470	114	62	3	167
rs13015253	2	219.736	212599229	129	47	21	149
rs1464443	2	220.123	212914726	12	164	116	54
rs7603109	2	220.392	213169514	5	171	120	50
rs7585465	2	220.789	213499445	155	21	61	109
rs920525	2	221.399	213986695	13	163	151	19
rs13420690	2	222.027	215235867	7	169	124	46
rs4610055	2	222.517	215847177	29	147	153	17
rs2692230	2	223.033	216257347	91	85	162	8
rs13022398	2	223.567	216577567	3	173	115	55
rs10804246	2	224.151	216841060	12	164	78	92
rs207819	2	224.643	217137464	27	149	130	40
rs28556275	2	224.898	217403458	116	60	1	169
rs1179701	2	225.879	217717319	108	68	29	141
rs6735740	2	226.622	217988422	144	32	8	162
rs6759238	2	227.206	218536449	8	168	106	64
rs11898315	2	227.861	218797766	163	13	46	124
rs1567869	2	228.329	219126735	42	134	162	8
rs4672903	2	228.722	219731017	159	17	31	139
rs2385404	2	229.143	220197388	172	4	43	127
rs675291	2	229.656	220473653	54	122	167	3
rs11692459	2	230.616	220794320	4	172	82	88
rs62185140	2	231.129	221261270	8	168	71	99
rs6751654	2	231.48	221514156	7	169	78	92
rs1344814	2	232.279	221925929	23	153	129	41
rs6724793	2	232.828	222192505	172	4	89	81
rs1477430	2	233.384	222607569	33	143	169	1
rs348980	2	233.934	222926680	12	164	97	73
rs4674659	2	234.742	223362480	27	149	155	15
rs17779311	2	235.031	223615362	5	171	67	103
rs12464000	2	235.377	223948401	13	163	99	71
rs631922	2	236.374	224643391	141	35	17	153
rs282273	2	236.671	224923022	163	13	47	123
rs12105326	2	237.014	225212510	153	23	44	126
rs13416139	2	237.435	225858116	129	47	25	145
rs2396218	2	237.946	226312824	15	161	128	42
rs11903376	2	238.355	226683986	146	30	2	168
rs7557179	2	238.703	226938795	66	110	1	169
rs7599150	2	238.971	227395509	169	7	67	103
rs7583928	2	239.696	227669542	166	10	39	131
rs11693898	2	240.315	228103909	62	114	152	18
rs6436710	2	240.853	228478141	164	12	70	100
rs17250137	2	241.93	228760543	19	157	89	81
rs4641922	2	242.251	229031147	12	164	91	79
rs13423599	2	242.564	229391200	165	11	55	115
rs10179193	2	243.157	229963577	46	130	158	12
rs57056068	2	243.516	230223451	76	100	15	155
rs35596599	2	244.306	230508778	1	175	102	68
rs11677105	2	244.799	231017020	18	158	93	77
rs3754941	2	245.143	231278929	8	168	59	111
rs4973342	2	245.699	231532555	119	57	1	169
rs3111780	2	246.23	231790097	162	14	53	117
rs11897387	2	246.686	232122576	167	9	52	118
rs17199600	2	247.063	232438403	10	166	73	97
rs3856543	2	247.431	232714531	161	15	50	120
rs6738099	2	247.729	233162120	156	20	27	143
rs10203110	2	248.114	233451949	79	97	1	169
rs58452179	2	248.71	233820101	122	54	11	159
rs1000141	2	249.735	234242347	7	169	99	71
rs6431648	2	250.234	234833457	167	9	29	141
rs1027868	2	251.669	235256745	144	32	10	160
rs7590552	2	253.052	235677775	130	46	13	157
rs2379178	2	254.382	235954162	172	4	66	104
rs57088602	2	255.698	236294462	143	33	1	169
rs1631149	2	256.314	236635374	6	170	92	78
rs7587505	2	256.841	236958688	167	9	77	93
rs61197218	2	257.361	237209197	151	25	6	164
rs73131738	2	257.857	237511509	161	15	36	134
rs11887482	2	258.467	237779984	119	57	1	169
rs6722218	2	258.891	238178091	172	4	87	83
rs60866447	2	259.741	238466538	170	6	42	128
rs59875811	2	260.214	238723304	32	144	1	169
rs6728445	2	260.781	239008681	122	54	18	152
rs28497373	2	261.205	239417840	151	25	7	163
rs67287027	2	262.043	239847098	116	60	7	163
rs291330	2	262.969	240144903	29	147	112	58
rs12479352	2	263.453	240435943	163	13	62	108
rs7573738	2	264.44	240699816	93	83	6	164
rs10197199	2	265.419	241002013	119	57	2	168
rs6437343	2	266.323	241367465	158	18	67	103
rs11897804	2	267.126	241818738	136	40	19	151
rs13382756	2	267.517	242072015	99	77	8	162
rs6437263	2	267.769	242470674	105	71	5	165
rs35320439	2	268.187	242737341	156	20	61	109
rs6740738	2	268.828	243007368	122	54	17	153
rs9681823	3	0.001819	62309	12	164	38	132
rs162416	3	0.253484	366039	167	9	49	121
rs9826534	3	0.807557	669478	143	33	13	157
rs1472714	3	1.45208	1092542	7	169	111	59
rs155409	3	2.11746	1355266	164	12	20	150
rs1878627	3	2.92277	1684810	41	135	157	13
rs1488745	3	3.42991	2001802	163	13	63	107
rs6793455	3	4.16215	2413502	166	10	89	81
rs2675290	3	5.4146	2753267	167	9	51	119
rs1669338	3	8.11764	3199635	61	115	156	14
rs7644488	3	8.99359	3558481	150	26	18	152
rs711584	3	9.95067	3838266	19	157	143	27
rs317534	3	10.2699	4099043	92	84	169	1
rs793939	3	10.6467	4414805	31	145	128	42
rs3805006	3	11.9717	4800769	7	169	124	46
rs11719134	3	12.8365	5051721	39	137	147	23
rs6785812	3	14.0412	5393294	3	173	111	59
rs1811510	3	15.082	5775231	168	8	9	161
rs7615497	3	15.7738	6080593	167	9	70	100
rs156170	3	16.8201	6451269	20	156	123	47
rs7652481	3	17.1179	6780247	10	166	99	71
rs1516303	3	18.672	7246745	161	15	46	124
rs7623055	3	19.1639	7510891	172	4	54	116
rs9814244	3	19.8253	7829821	97	79	7	163
rs6773116	3	20.4209	8243455	110	66	14	156
rs9866032	3	21.0614	8551112	168	8	120	50
rs888566	3	22.6282	8825741	160	16	40	130
rs2664106	3	23.3532	9208152	7	169	104	66
rs6774483	3	24.0154	9539655	122	54	21	149
rs2302786	3	24.735	9979660	167	9	40	130
rs9841368	3	25.2291	10445313	141	35	9	161
rs11719375	3	26.1024	10706597	167	9	30	140
rs11717050	3	27.3031	11102709	12	164	117	53
rs7614263	3	27.7788	11650269	16	160	116	54
rs380004	3	28.8663	12051647	114	62	9	161
rs6806919	3	29.1757	12839915	132	44	11	159
rs7632077	3	30.4708	13284808	166	10	35	135
rs2655233	3	30.8521	13573068	12	164	102	68
rs3762721	3	31.6254	13895806	128	48	23	147
rs11718660	3	32.7304	14531786	4	172	80	90
rs1687308	3	33.5644	14846254	173	3	54	116
rs7636739	3	34.039	15333551	134	42	15	155
rs55854808	3	34.3477	15966998	167	9	59	111
rs73818338	3	34.8738	16288976	60	116	4	166
rs17200369	3	35.2668	16592134	148	28	40	130
rs11431086	3	35.8542	17152791	173	3	87	83
rs12630303	3	36.4365	18392551	11	165	103	67
rs9830798	3	37.0179	18866539	143	33	49	121
rs6551252	3	37.8576	19445424	162	14	84	86
rs269361	3	38.1163	19912501	158	18	68	102
rs1395100	3	38.6552	20604321	89	87	4	166
rs6810339	3	39.0046	20912261	135	41	45	125
rs9828169	3	39.3281	21173442	72	104	1	169
rs400737	3	39.6459	21486393	39	137	127	43
rs2673532	3	40.6596	21873561	67	109	136	34
rs1965306	3	41.5026	22205505	170	6	75	95
rs9654039	3	41.8131	22561085	148	28	40	130
rs58265171	3	42.166	22942271	126	50	18	152
rs28569360	3	42.9461	23711141	161	15	34	136
rs1511540	3	43.4047	24152386	161	15	31	139
rs6795607	3	44.4321	24631165	144	32	14	156
rs7610607	3	45.2414	24904904	147	29	35	135
rs6801559	3	45.7321	25335157	113	63	28	142
rs12638028	3	46.6193	25748324	6	170	142	28
rs7645906	3	46.9914	26327071	165	11	34	136
rs6763642	3	47.5723	26749653	141	35	12	158
rs35642944	3	47.9588	27002933	8	168	44	126
rs2289803	3	48.2125	27296212	164	12	57	113
rs4367017	3	48.5054	27718427	147	29	16	154
rs7639905	3	48.971	27976864	14	162	88	82
rs34355769	3	49.7009	28666706	5	171	95	75
rs6549903	3	50.1416	29017757	159	17	20	150
rs9811374	3	50.7879	29285727	151	25	26	144
rs9870303	3	51.5655	29583374	115	61	14	156
rs2197896	3	52.3661	30032530	146	30	5	165
rs9834473	3	52.8901	30287460	144	32	86	84
rs1812581	3	53.3937	30597411	80	96	3	167
rs72849879	3	53.8588	30868873	133	43	3	167
rs7625163	3	54.1262	31175501	165	11	61	109
rs9863982	3	54.5152	31534154	169	7	36	134
rs11716090	3	54.8727	31807370	18	158	123	47
rs9880900	3	55.5599	32171117	173	3	72	98
rs6803174	3	56.7273	32652647	157	19	42	128
rs1599772	3	57.0115	32923426	49	127	165	5
rs4678958	3	57.498	33447446	158	18	55	115
rs13063064	3	57.8753	34018899	14	162	130	40
rs13080033	3	58.1539	34681418	25	151	118	52
rs9311121	3	58.9064	35928063	151	25	7	163
rs1450005	3	59.1963	36194167	166	10	41	129
rs73052193	3	59.6637	36717157	2	174	58	112
rs4678932	3	60.1063	37096303	6	170	99	71
rs72862213	3	60.5763	37838991	106	70	4	166
rs2284819	3	61.0589	38557161	172	4	72	98
rs7630022	3	61.7948	39115494	163	13	34	136
rs2276715	3	62.0861	39432247	2	174	91	79
rs2123999	3	62.814	40378738	15	161	123	47
rs6807519	3	63.1675	40899921	158	18	58	112
rs11129895	3	63.6285	41283382	8	168	98	72
rs9847688	3	63.8944	42079111	170	6	45	125
rs33479	3	64.3496	42413481	126	50	2	168
rs339698	3	64.8433	42732236	106	70	3	167
rs13320571	3	65.274	43334020	27	149	160	10
rs7625991	3	65.9191	44136424	156	20	55	115
rs62242565	3	66.2626	44908211	26	150	91	79
rs33770	3	66.8808	45282691	14	162	125	45
rs9824886	3	67.5288	46108247	172	4	61	109
rs2385860	3	67.9554	46910618	163	13	25	145
rs743856	3	68.2736	50527874	143	33	24	146
rs498946	3	68.688	52434967	141	35	26	144
rs11130350	3	68.9532	53215875	16	160	117	53
rs4687591	3	69.6456	53864407	160	16	26	144
rs9631507	3	69.9967	54115578	9	167	76	94
rs6784395	3	70.5343	54379733	158	18	56	114
rs11705800	3	71.0417	54635037	13	163	70	100
rs1168710	3	71.4939	54907940	131	45	10	160
rs1444866	3	72.3874	55385093	172	4	64	106
rs815470	3	72.8386	55679841	53	123	148	22
rs7628255	3	73.3807	56223384	62	114	150	20
rs2133884	3	73.7235	56846069	6	170	104	66
rs839231	3	74.4057	58022761	118	58	7	163
rs1444186	3	75.0638	58654892	42	134	158	12
rs4681909	3	75.3544	59099358	169	7	85	85
rs10454231	3	75.9986	59463037	122	54	13	157
rs604398	3	76.8899	59863847	19	157	149	21
rs970045	3	78.228	60349462	168	8	74	96
rs10510855	3	79.5086	60841656	33	143	137	33
rs7641177	3	79.7622	61183158	172	4	53	117
rs4688643	3	80.2785	61601011	25	151	115	55
rs6445244	3	80.72	61893518	154	22	54	116
rs62243885	3	81.3291	62250256	11	165	78	92
rs833660	3	81.9998	62552794	25	151	146	24
rs2367433	3	83.0214	62957975	77	99	1	169
rs9829530	3	83.484	63404743	129	47	19	151
rs6797493	3	84.4781	63672720	170	6	104	66
rs864085	3	85.0956	64309155	171	5	49	121
rs4688486	3	85.8457	64582081	159	17	26	144
rs9834596	3	86.5558	65034421	35	141	152	18
rs9881555	3	86.9842	65330251	94	82	1	169
rs7627760	3	87.3758	65582012	84	92	113	57
rs73832980	3	88.0071	65839314	103	73	1	169
rs73127772	3	88.2977	66140704	3	173	44	126
rs4856818	3	88.6167	66530304	25	151	168	2
rs11916711	3	89.4768	66879884	166	10	39	131
rs60601322	3	89.7805	67298276	101	75	10	160
rs1928565	3	90.3754	67580121	136	40	20	150
rs1459903	3	90.7365	67846073	90	86	154	16
rs13316279	3	91.0659	68110036	21	155	63	107
rs1352855	3	91.5456	68362436	128	48	21	149
rs9840077	3	92.0398	69206654	55	121	167	3
rs6549230	3	92.7843	69585113	165	11	91	79
rs35026817	3	93.2057	70136592	8	168	114	56
rs805473	3	93.5647	70398928	109	67	130	40
rs4321494	3	93.9956	70664000	26	150	100	70
rs9822461	3	94.265	71081796	159	17	2	168
rs7644066	3	94.8048	71382085	27	149	116	54
rs704279	3	95.483	71711979	134	42	19	151
rs79974304	3	96.4446	72043000	35	141	147	23
rs9310238	3	97.3743	72308526	162	14	81	89
rs36061263	3	98.0549	72578312	8	168	143	27
rs62249927	3	99.1206	73013803	1	175	89	81
rs11718761	3	99.4988	73354642	94	82	169	1
rs4132538	3	100.267	73654032	152	24	33	137
rs1526719	3	100.807	73976471	11	165	95	75
rs549560	3	101.684	74398369	164	12	33	137
rs4438682	3	102.359	75331002	8	168	99	71
rs7611923	3	102.96	75974251	48	128	147	23
rs62261374	3	103.392	76317234	38	138	154	16
rs11127559	3	103.786	76809834	3	173	73	97
rs7648227	3	104.325	77092253	12	164	118	52
rs11712519	3	105.232	77885564	4	172	89	81
rs9830459	3	105.637	78608348	28	148	113	57
rs1563382	3	105.952	79236891	13	163	157	13
rs2639242	3	106.327	81019528	144	32	7	163
rs1492886	3	106.723	81607486	172	4	91	79
rs6805632	3	107.185	82803715	45	131	159	11
rs60311538	3	107.665	85470687	13	163	106	64
rs9843405	3	107.929	86637887	168	8	36	134
rs9866824	3	108.339	87417191	4	172	133	37
rs7640948	3	108.745	88521129	37	139	130	40
rs1521807	3	109.132	90078623	132	44	9	161
rs7624575	3	109.592	95353835	57	119	168	2
rs28604999	3	109.883	96610897	172	4	5	165
rs7647570	3	110.786	98339277	165	11	28	142
rs1531729	3	111.209	99075918	172	4	56	114
rs1661287	3	111.569	100102080	140	36	20	150
rs9290245	3	111.974	100612453	26	150	131	39
rs1479365	3	112.817	101904549	98	78	20	150
rs1947581	3	113.454	102803572	60	116	154	16
rs7624495	3	113.932	103261054	165	11	50	120
rs1379628	3	114.201	103524377	103	73	7	163
rs4895064	3	114.597	104051645	48	128	166	4
rs12489482	3	114.906	104579408	22	154	158	12
rs1525845	3	115.378	104952730	82	94	164	6
rs1522290	3	115.758	105330571	138	38	61	109
rs9846331	3	116.469	105736306	161	15	41	129
rs6437685	3	117.016	106360585	15	161	115	55
rs6791146	3	117.567	106903210	7	169	57	113
rs1282549	3	117.956	107175486	78	98	162	8
rs877859	3	118.388	107714075	9	167	118	52
rs13067866	3	119.018	108628744	162	14	88	82
rs1163447	3	119.414	109056751	163	13	12	158
rs13091462	3	119.7	109697536	16	160	103	67
rs11714866	3	119.95	110067902	32	144	158	12
rs1462809	3	120.498	110613623	5	171	142	28
rs973208	3	120.798	111080687	23	153	142	28
rs1844925	3	121.305	111760479	27	149	142	28
rs9288952	3	121.824	112185025	17	159	164	6
rs3864002	3	122.303	112726411	28	148	138	32
rs55647743	3	122.81	113311067	14	162	92	78
rs167771	3	123.49	113876275	20	156	140	30
rs13090443	3	124.045	114143091	20	156	130	40
rs6762934	3	124.321	114419948	14	162	128	42
rs6806816	3	124.618	115209138	142	34	8	162
rs938521	3	125.738	115575949	118	58	23	147
rs9836711	3	126.269	115972709	21	155	144	26
rs12629515	3	126.754	116439783	9	167	148	22
rs1402620	3	127.893	116903373	3	173	95	75
rs12695349	3	128.24	117156463	5	171	135	35
rs6781396	3	128.799	117439643	10	166	106	64
rs6779441	3	129.159	118016233	99	77	6	164
rs6762051	3	129.482	118584960	146	30	12	158
rs56195264	3	130.062	119203154	120	56	4	166
rs6782799	3	130.472	119610793	171	5	58	112
rs560420	3	131.483	120549141	118	58	27	143
rs12629742	3	131.858	121614895	4	172	43	127
rs10190	3	132.196	122005236	26	150	109	61
rs1256200	3	132.621	122412901	151	25	35	135
rs1123612	3	133.008	122753644	162	14	22	148
rs56076046	3	133.49	123008228	8	168	68	102
rs2697520	3	133.964	123289679	167	9	17	153
rs7650630	3	134.473	123685069	107	69	1	169
rs2651609	3	134.902	124331837	96	80	1	169
rs7626291	3	135.462	124757777	90	86	2	168
rs2001911	3	136.248	125137292	167	9	79	91
rs735739	3	136.824	125993533	123	53	10	160
rs4234280	3	137.474	126778239	109	67	8	162
rs7429531	3	137.952	127067815	120	56	41	129
rs803325	3	138.433	127428707	173	3	83	87
rs3828417	3	139.209	128128254	141	35	11	159
rs4303883	3	139.759	128890350	55	121	167	3
rs6780938	3	140.075	129401505	3	173	146	24
rs62281648	3	140.369	129963637	5	171	111	59
rs12494489	3	140.724	130253353	37	139	143	27
rs1554513	3	140.974	130504256	146	30	21	149
rs2129154	3	141.265	131130907	131	45	12	158
rs1225074	3	141.914	131694705	13	163	106	64
rs12638395	3	142.25	131972167	151	25	32	138
rs954308	3	142.532	132235990	162	14	63	107
rs1568480	3	142.82	132740226	171	5	96	74
rs7629752	3	143.983	133298732	10	166	116	54
rs1534169	3	144.281	133590825	5	171	76	94
rs16841609	3	144.988	134097202	85	91	2	168
rs3732568	3	145.387	134515336	30	146	153	17
rs253876	3	145.831	134768915	173	3	94	76
rs9826153	3	146.342	135268608	51	125	150	20
rs11929600	3	147.076	137011022	9	167	122	48
rs1902578	3	147.643	137556140	4	172	85	85
rs641320	3	148.021	138347957	144	32	7	163
rs6439844	3	148.415	138986127	157	19	43	127
rs47442	3	148.71	139307160	4	172	74	96
rs7645419	3	149.423	139874594	131	45	2	168
rs7613319	3	150.131	140307571	104	72	1	169
rs35140461	3	150.421	140683688	138	38	15	155
rs11917422	3	151.066	141022487	161	15	45	125
rs12106890	3	151.748	141519874	136	40	13	157
rs7628622	3	152.094	141893901	160	16	20	150
rs6440124	3	152.478	142660146	169	7	96	74
rs7641350	3	153.055	142991226	163	13	24	146
rs60777877	3	153.617	143311275	77	99	4	166
rs9832471	3	154.301	143570871	34	142	165	5
rs7648002	3	154.774	144426904	168	8	12	158
rs10804703	3	155.066	144791108	32	144	128	42
rs6786468	3	156.023	145682534	152	24	32	138
rs1159914	3	156.283	146037209	43	133	136	34
rs11928953	3	156.724	146634035	139	37	42	128
rs73004607	3	156.985	147082898	82	94	1	169
rs1320026	3	157.478	147468058	171	5	90	80
rs4681404	3	158.382	148003233	160	16	44	126
rs1492084	3	158.778	148395342	21	155	135	35
rs1066185	3	159.49	148955856	166	10	52	118
rs13087248	3	160.382	149227159	3	173	76	94
rs716352	3	160.944	149626430	3	173	71	99
rs7629443	3	161.21	149925742	117	59	2	168
rs13100847	3	161.575	150207981	65	111	145	25
rs1220544	3	162.051	150594033	11	165	102	68
rs2567322	3	163.033	150883600	5	171	99	71
rs12486484	3	163.564	151597173	154	22	84	86
rs323629	3	163.828	151927593	13	163	110	60
rs6786253	3	164.158	152575924	147	29	24	146
rs7649037	3	164.458	152837273	146	30	9	161
rs6764190	3	164.913	153258272	172	4	45	125
rs6776293	3	165.601	154405414	110	66	7	163
rs2314612	3	165.888	154716357	3	173	103	67
rs1385482	3	166.578	154980236	66	110	12	158
rs181696	3	166.867	155266104	15	161	132	38
rs57357532	3	167.444	156167351	153	23	16	154
rs11720805	3	167.947	156800360	12	164	118	52
rs13321617	3	168.386	157574539	15	161	93	77
rs4679853	3	168.991	158821836	14	162	119	51
rs6805934	3	169.372	159327356	160	16	24	146
rs33054	3	169.665	159602263	173	3	106	64
rs1455873	3	170.204	160508778	173	3	69	101
rs2063361	3	170.771	161865945	23	153	143	27
rs150218	3	171.03	162491010	161	15	61	109
rs822713	3	171.705	165010692	13	163	108	62
rs1355535	3	172.001	165505759	12	164	124	46
rs1916286	3	172.443	166580001	27	149	131	39
rs9811119	3	172.689	167160385	154	22	28	142
rs7650181	3	173.079	167604769	169	7	59	111
rs7618370	3	173.427	167909303	166	10	29	141
rs1463814	3	174.234	168632238	121	55	4	166
rs9290364	3	174.722	168995182	165	11	5	165
rs7629654	3	175.205	169365395	127	49	10	160
rs3755609	3	175.456	169682083	109	67	32	138
rs11721025	3	175.776	170171738	4	172	103	67
rs9857741	3	176.164	170695415	2	174	85	85
rs13084948	3	176.806	171077831	10	166	126	44
rs9868868	3	177.599	171364327	79	97	2	168
rs9862319	3	177.888	171656847	172	4	92	78
rs1994962	3	178.806	172000456	170	6	69	101
rs17757815	3	180.064	172479124	8	168	104	66
rs9809565	3	180.432	172923634	97	79	7	163
rs11709498	3	181.334	173180633	21	155	111	59
rs7643912	3	181.901	173474391	11	165	101	69
rs13317150	3	182.315	173888932	94	82	8	162
rs481004	3	182.952	174476650	21	155	107	63
rs9865132	3	183.26	174732812	164	12	23	147
rs9879950	3	184.06	175001029	153	23	57	113
rs12107747	3	184.825	175389857	130	46	11	159
rs7613836	3	185.57	175863867	120	56	3	167
rs62287591	3	185.831	176123690	13	163	83	87
rs1601949	3	186.399	176592050	32	144	142	28
rs61053139	3	186.772	176860096	42	134	103	67
rs13071776	3	187.36	177162070	5	171	74	96
rs1978396	3	188.167	177603160	156	20	17	153
rs7652385	3	188.662	178336583	159	17	53	117
rs10049286	3	189.12	179106847	127	49	28	142
rs7610873	3	189.702	179485664	107	69	18	152
rs1851352	3	189.958	179752325	143	33	46	124
rs2567644	3	190.344	180938727	21	155	149	21
rs10937074	3	191.347	181637333	4	172	105	65
rs9850886	3	191.658	181954164	161	15	37	133
rs2717285	3	192.232	182340738	7	169	107	63
rs13078931	3	192.777	182778941	4	172	120	50
rs9824180	3	193.067	183067472	148	28	29	141
rs9827156	3	193.751	183380900	169	7	36	134
rs6443958	3	194.25	184014481	153	23	40	130
rs7614232	3	195.579	184452676	32	144	144	26
rs16859737	3	196.106	184890501	106	70	10	160
rs9850770	3	196.389	185454844	121	55	24	146
rs9834934	3	196.796	185721672	48	128	169	1
rs2239626	3	197.848	185998884	145	31	42	128
rs9871546	3	198.758	186304218	1	175	121	49
rs9860747	3	199.392	186587417	56	120	145	25
rs9823203	3	200.292	186874641	168	8	37	133
rs7629178	3	200.934	187154182	13	163	78	92
rs1851682	3	201.545	187416089	2	174	106	64
rs2378359	3	202.055	187756755	39	137	135	35
rs17602709	3	202.899	188070408	5	171	68	102
rs7645635	3	203.96	188327555	137	39	1	169
rs710493	3	205.042	188694749	17	159	169	1
rs1399615	3	205.942	189057350	165	11	62	108
rs9817608	3	207.098	189533192	11	165	84	86
rs1403418	3	207.554	189804656	101	75	1	169
rs2193880	3	208.55	190262799	7	169	95	75
rs6807312	3	209.105	190576288	175	1	62	108
rs6794535	3	210.063	190973610	141	35	11	159
rs13077141	3	210.592	191286128	96	80	4	166
rs9880767	3	210.88	191761447	173	3	66	104
rs9877210	3	211.284	192019370	147	29	10	160
rs59998492	3	212.541	192370267	5	171	76	94
rs10937559	3	213.043	192622641	3	173	103	67
rs4687386	3	213.511	192912706	9	167	97	73
rs9879227	3	213.999	193174782	79	97	16	154
rs13083515	3	214.326	193523296	5	171	84	86
rs9854429	3	215.444	193822749	8	168	103	67
rs6772399	3	217.107	194108645	167	9	33	137
rs10933668	3	217.862	194470632	159	17	48	122
rs2048903	3	218.568	194747548	11	165	107	63
rs9823964	3	219.104	195004904	50	126	88	82
rs7659	3	219.392	195295661	10	166	124	46
rs12490642	3	219.925	195616208	142	34	52	118
rs1868198	3	220.276	195876780	128	48	24	146
rs11715619	3	220.845	196334416	149	27	30	140
rs1060357	3	221.768	196728633	37	139	138	32
rs2567352	3	222.567	197213086	9	167	126	44
rs56999795	3	223.206	197655885	163	13	37	133
rs13124826	4	0.371295	208400	21	155	84	86
rs7668455	4	0.634408	533399	125	51	21	149
rs62294154	4	0.890782	799121	109	67	27	143
rs6814865	4	1.22149	1351157	170	6	48	122
rs6852065	4	1.84604	1684409	2	174	96	74
rs7689629	4	2.29819	2193520	154	22	27	143
rs231333	4	2.81244	2796970	153	23	37	133
rs28628796	4	3.75621	3618194	139	37	18	152
rs28678310	4	6.57911	3883022	139	37	3	167
rs4498088	4	8.37897	4386137	167	9	52	118
rs4689182	4	8.99211	4759743	169	7	68	102
rs10034967	4	10.6151	5233943	4	172	153	17
rs4353849	4	11.2458	5638652	152	24	7	163
rs4689327	4	13.1198	6070676	29	147	155	15
rs35776737	4	14.5556	6348916	6	170	96	74
rs6854931	4	16.3781	6777164	161	15	46	124
rs4689584	4	16.9799	7061219	93	83	164	6
rs3864203	4	18.3159	7328416	163	13	37	133
rs10015734	4	20.0041	7651008	136	40	16	154
rs6811851	4	20.8836	7911771	166	10	63	107
rs1281148	4	22.2165	8229713	32	144	127	43
rs4696917	4	23.3941	8705921	34	142	154	16
rs10014876	4	25.5223	9430269	163	13	47	123
rs4697981	4	25.835	10241991	61	115	165	5
rs56271776	4	26.3301	10907311	3	173	67	103
rs10009253	4	26.9225	11216238	147	29	15	155
rs56194418	4	27.7549	11647937	88	88	2	168
rs12500641	4	28.0917	12082920	8	168	71	99
rs6825164	4	28.4389	12441831	137	39	5	165
rs1021873	4	28.9055	13094261	8	168	78	92
rs1476211	4	29.409	13542036	10	166	134	36
rs565463	4	30.4501	14032969	17	159	101	69
rs177912	4	30.8864	14299781	131	45	31	139
rs6814871	4	31.4441	14756500	151	25	38	132
rs13144360	4	31.9276	15057867	21	155	105	65
rs13116402	4	32.297	15429967	21	155	120	50
rs17478336	4	33.1083	16025837	3	173	102	68
rs10026610	4	33.5708	16462250	98	78	6	164
rs513488	4	34.427	16767708	15	161	127	43
rs28479818	4	34.7966	17062043	96	80	23	147
rs2872795	4	35.3998	17330381	17	159	130	40
rs10018675	4	36.1392	18117532	173	3	45	125
rs7656712	4	36.3988	18709859	132	44	9	161
rs207363	4	36.8591	19005988	105	71	1	169
rs35842005	4	37.1585	19988153	4	172	85	85
rs17608777	4	37.4537	20311971	5	171	50	120
rs609535	4	38.027	20568566	169	7	106	64
rs9291418	4	38.3223	20867460	136	40	46	124
rs1425333	4	38.5799	21255650	128	48	18	152
rs35500167	4	39.56	22034026	3	173	135	35
rs66481903	4	40.1241	22586078	3	173	91	79
rs10024413	4	40.6403	23237373	55	121	159	11
rs7657054	4	40.8907	23501919	86	90	3	167
rs885395	4	41.1888	23770218	22	154	160	10
rs1267017	4	42.0198	24151452	126	50	17	153
rs6817993	4	42.4926	24438686	22	154	123	47
rs7688355	4	43.3047	24773811	113	63	1	169
rs13115853	4	44.0561	25046940	18	158	115	55
rs7663245	4	44.3606	25307423	15	161	97	73
rs1520280	4	44.8246	25570751	166	10	33	137
rs6842695	4	45.9483	25861359	144	32	16	154
rs6824647	4	46.8762	26177372	137	39	33	137
rs3113032	4	47.3223	26473220	150	26	33	137
rs34477647	4	47.7049	26836652	2	174	65	105
rs35777491	4	48.1799	27170626	12	164	105	65
rs13114969	4	48.7923	27448483	13	163	91	79
rs61793032	4	49.3362	27856655	27	149	93	77
rs12646353	4	49.8052	28547480	5	171	88	82
rs10028683	4	50.3451	28943994	72	104	1	169
rs17714421	4	50.6202	29299647	3	173	83	87
rs11946295	4	51.117	29894959	172	4	48	122
rs2571481	4	51.7327	30216701	161	15	43	127
rs6448733	4	52.3524	31028190	175	1	51	119
rs289079	4	53.1353	31414779	9	167	116	54
rs6448786	4	53.4472	31776899	153	23	62	108
rs12650672	4	53.8479	32279524	16	160	130	40
rs6811247	4	54.1511	32571282	162	14	72	98
rs73139004	4	54.5966	33105845	171	5	35	135
rs6811233	4	55.7368	33658676	171	5	21	149
rs1383569	4	56.0084	34547374	167	9	41	129
rs11934931	4	56.424	35183361	130	46	9	161
rs7694338	4	56.9887	35734385	161	15	71	99
rs997572	4	57.2448	36048773	10	166	119	51
rs16992136	4	57.5512	36350375	96	80	10	160
rs1079502	4	57.9673	36829274	25	151	145	25
rs10856828	4	58.4483	37380073	30	146	112	58
rs11096895	4	59.1137	37672875	45	131	162	8
rs4832744	4	59.8727	37930134	9	167	57	113
rs10000663	4	60.5759	38321709	13	163	113	57
rs17616434	4	61.2403	38812876	161	15	30	140
rs2060005	4	62.0211	39162521	4	172	106	64
rs10517530	4	62.2729	39788949	5	171	64	106
rs74673754	4	62.6668	40237632	97	79	1	169
rs373103	4	63.7016	40553177	161	15	42	128
rs4861358	4	64.7178	41015899	46	130	141	29
rs10009653	4	65.1202	41299915	174	2	95	75
rs6414658	4	65.6326	41577086	174	2	32	138
rs11932228	4	66.3714	41854126	170	6	35	135
rs6829929	4	66.8549	42226548	168	8	71	99
rs1450912	4	67.2905	42809637	154	22	56	114
rs11944506	4	67.5855	43352688	12	164	142	28
rs1371238	4	68.1591	44531529	17	159	127	43
rs28457819	4	69.2254	47418991	169	7	67	103
rs55693442	4	69.5592	47964586	3	173	72	98
rs6554330	4	69.8373	53092159	30	146	168	2
rs3912335	4	70.1997	53897020	41	135	157	13
rs10517309	4	70.7516	54672845	6	170	101	69
rs6554147	4	71.0223	54958646	27	149	89	81
rs1156180	4	71.5575	55259169	21	155	154	16
rs4864926	4	72.1456	55680855	136	40	28	142
rs17081857	4	73.3608	56043330	31	145	156	14
rs4457009	4	73.622	56547727	20	156	1	169
rs2951806	4	73.879	56905444	167	9	73	97
rs10005459	4	74.754	57165955	171	5	80	90
rs6819021	4	75.719	57623536	172	4	72	98
rs10014421	4	76.4892	58064464	172	4	59	111
rs511325	4	76.9415	58589423	46	130	150	20
rs781463	4	77.3426	58906509	155	21	58	112
rs1522097	4	77.6342	59246311	123	53	64	106
rs7437815	4	77.8963	59826005	1	175	80	90
rs17089959	4	78.6733	60994654	20	156	131	39
rs13122165	4	79.1635	61762061	7	169	110	60
rs2218741	4	79.6399	62049284	15	161	88	82
rs335338	4	80.0722	62331692	65	111	163	7
rs34133572	4	80.7057	63353705	7	169	87	83
rs10032765	4	80.9994	63722484	16	160	161	9
rs1462605	4	81.5448	64154567	21	155	129	41
rs970631	4	81.9681	65289289	25	151	146	24
rs13143183	4	82.3419	65851855	1	175	113	57
rs34604848	4	82.6176	66364523	7	169	93	77
rs364705	4	83.2963	67125863	151	25	38	132
rs1390066	4	83.855	67809075	141	35	25	145
rs974333	4	84.4911	68707832	41	135	143	27
rs7442348	4	84.7873	69425191	10	166	113	57
rs2014777	4	85.3222	70671743	20	156	116	54
rs13131960	4	85.909	71475446	137	39	8	162
rs12648166	4	86.3905	71873745	8	168	97	73
rs1840086	4	86.6407	72135358	12	164	152	18
rs7656604	4	87.0652	72547436	145	31	1	169
rs7660290	4	87.5765	73255740	10	166	143	27
rs4694633	4	88.0508	74569407	47	129	161	9
rs28823933	4	88.4188	75052592	16	160	158	12
rs6842490	4	89.1491	75717803	126	50	23	147
rs28580245	4	89.6422	75992736	170	6	46	124
rs7696758	4	90.1418	76757884	56	120	154	16
rs1348204	4	90.3973	77070290	167	9	49	121
rs10023335	4	90.6795	77358987	3	173	78	92
rs7677682	4	91.1969	77740367	118	58	8	162
rs6822800	4	91.7926	78106441	139	37	24	146
rs958617	4	92.4948	78605369	12	164	140	30
rs17002988	4	92.8276	79079757	36	140	116	54
rs1390738	4	93.3028	79481578	8	168	140	30
rs7687681	4	93.5622	79884416	6	170	144	26
rs4572901	4	94.0464	80582492	50	126	166	4
rs60559297	4	94.4151	80997743	157	19	21	149
rs7670914	4	94.8358	81346970	27	149	133	37
rs7696645	4	95.1434	82070517	166	10	26	144
rs10488928	4	95.3891	82332999	138	38	8	162
rs471389	4	96.4249	82756077	150	26	20	150
rs17005557	4	96.7542	83188904	46	130	2	168
rs9968403	4	97.0789	83447941	155	21	34	136
rs13129469	4	97.6078	83991529	7	169	151	19
rs1494962	4	99.0528	84336283	156	20	19	151
rs6854730	4	99.3248	84642876	135	41	36	134
rs11099632	4	99.8479	84943867	12	164	136	34
rs387955	4	100.21	85314016	68	108	169	1
rs4527465	4	100.565	86029339	39	137	165	5
rs2624023	4	101.252	86656724	34	142	149	21
rs1584346	4	101.847	87839844	3	173	100	70
rs6815338	4	102.234	88501530	128	48	1	169
rs2725264	4	102.689	89026109	18	158	160	10
rs17014118	4	103.278	89319296	147	29	27	143
rs2972028	4	103.586	89655191	151	25	53	117
rs17015492	4	104.622	90280428	5	171	108	62
rs3857050	4	104.927	90625419	148	28	14	156
rs11097250	4	105.315	91361696	164	12	28	142
rs12640033	4	105.782	91949192	3	173	79	91
rs73837194	4	106.438	93064104	96	80	3	167
rs1433674	4	106.78	94205591	7	169	104	66
rs4558831	4	107.346	94761551	173	3	67	103
rs3805300	4	107.709	95424208	152	24	39	131
rs10213566	4	108.248	95829907	70	106	5	165
rs2865419	4	108.654	96201104	130	46	17	153
rs4699443	4	109.642	96609380	22	154	142	28
rs9997683	4	109.908	96860000	36	140	92	78
rs28544332	4	110.31	97575919	5	171	86	84
rs28452928	4	110.775	98421671	141	35	5	165
rs10023791	4	111.098	99425353	154	22	70	100
rs1881157	4	111.609	99712077	162	14	35	135
rs10021082	4	112.052	100444178	138	38	12	158
rs1392887	4	112.868	101342922	168	8	81	89
rs34076864	4	113.124	101868576	106	70	18	152
rs13116679	4	113.555	102199215	15	161	124	46
rs7662047	4	114.115	103091730	149	27	3	167
rs2169510	4	114.708	104194384	93	83	1	169
rs13107718	4	115.034	104533240	5	171	127	43
rs7681476	4	115.444	104921323	127	49	6	164
rs72951372	4	115.717	105388556	140	36	6	164
rs1076216	4	116.265	106412410	27	149	128	42
rs2544395	4	116.634	106705863	14	162	131	39
rs1038853	4	117.603	108177821	171	5	73	97
rs4147477	4	118.382	109119090	3	173	80	90
rs7667423	4	118.634	109372293	123	53	34	136
rs35790546	4	118.917	109658889	5	171	71	99
rs2194860	4	119.296	109948511	125	51	22	148
rs6848452	4	119.784	110326825	158	18	26	144
rs2074392	4	120.128	110928949	131	45	15	155
rs9990445	4	120.694	111227913	88	88	1	169
rs3866831	4	121.414	111732114	7	169	115	55
rs296991	4	121.976	112031286	110	66	164	6
rs6830890	4	122.267	112519126	6	170	22	148
rs7672688	4	122.546	113001776	172	4	84	86
rs965013	4	122.886	113310981	148	28	69	101
rs7689257	4	123.144	113861627	162	14	39	131
rs2272229	4	124.248	114260641	129	47	17	153
rs7660775	4	124.869	114611948	148	28	26	144
rs2374223	4	125.386	114942909	43	133	150	20
rs4833450	4	125.7	115306803	2	174	88	82
rs59187191	4	126.031	115732361	131	45	10	160
rs13148562	4	126.594	117106682	5	171	153	17
rs13114307	4	127.015	117716133	140	36	39	131
rs11562894	4	127.573	118477406	105	71	15	155
rs2389504	4	127.941	118981759	4	172	121	49
rs12509446	4	128.504	120075410	18	158	115	55
rs6855878	4	129.183	121479039	172	4	110	60
rs4406041	4	129.459	121949190	26	150	139	31
rs12510951	4	130.09	122377715	151	25	50	120
rs7661218	4	130.631	122690284	110	66	9	161
rs4833253	4	131.064	123578850	137	39	23	147
rs13139203	4	131.316	124217437	3	173	104	66
rs752499	4	131.822	124527958	9	167	65	105
rs1979788	4	132.675	125854382	20	156	128	42
rs17009954	4	133.231	126458789	135	41	16	154
rs4596255	4	133.483	126712350	168	8	92	78
rs1466523	4	133.911	127149057	40	136	156	14
rs11098878	4	134.549	127414252	51	125	158	12
rs1913468	4	134.804	128472231	159	17	56	114
rs1216400	4	135.136	129512318	34	142	155	15
rs4554091	4	136.16	130300615	171	5	76	94
rs11099027	4	136.653	130952981	147	29	3	167
rs1033018	4	137.015	131215475	156	20	32	138
rs68103088	4	137.351	131621323	88	88	6	164
rs13102411	4	138.226	133441842	6	170	63	107
rs6534907	4	138.502	133743326	34	142	137	33
rs7659401	4	138.944	134222973	173	3	74	96
rs2174784	4	139.212	134613019	63	113	169	1
rs4552527	4	139.603	135548788	44	132	115	55
rs7660650	4	140.062	135916339	28	148	111	59
rs4404609	4	140.674	136768203	11	165	126	44
rs7696257	4	141.149	137474783	156	20	62	108
rs488064	4	142.054	137974026	1	175	93	77
rs17049637	4	142.413	138369854	152	24	39	131
rs17233656	4	142.934	138948071	4	172	70	100
rs2114359	4	143.633	139437272	31	145	123	47
rs6854489	4	144.241	139764049	170	6	83	87
rs7673958	4	144.587	140175054	157	19	61	109
rs795371	4	145.159	140541695	170	6	99	71
rs3733382	4	145.839	140811135	10	166	138	32
rs11728088	4	146.568	141076076	11	165	126	44
rs4956451	4	146.873	141501338	162	14	57	113
rs11726028	4	147.213	141773795	8	168	126	44
rs1550058	4	147.973	142100289	5	171	82	88
rs7656774	4	148.335	142695685	174	2	102	68
rs1907137	4	148.706	143164317	5	171	146	24
rs77840128	4	149.03	143415550	9	167	46	124
rs5026328	4	149.326	143982333	7	169	123	47
rs4402988	4	149.777	145088692	48	128	148	22
rs6848098	4	150.708	146447193	122	54	4	166
rs7658773	4	151.085	146843410	172	4	64	106
rs1057560	4	151.615	147177341	5	171	91	79
rs1507493	4	151.937	148029669	4	172	123	47
rs17614025	4	152.529	148810260	10	166	160	10
rs13118022	4	153.168	149345587	26	150	105	65
rs862656	4	153.655	149821551	172	4	72	98
rs1113890	4	154.113	150784347	169	7	50	120
rs2407548	4	154.544	151850524	21	155	157	13
rs361198	4	154.805	152756909	12	164	111	59
rs17276701	4	155.244	153102565	12	164	85	85
rs28587268	4	155.51	153400874	159	17	55	115
rs56352091	4	156.285	153823694	30	146	107	63
rs28754692	4	157.295	154125435	166	10	40	130
rs6535921	4	157.561	154450096	172	4	55	115
rs9992080	4	158.297	154832776	106	70	4	166
rs7692206	4	158.776	155106693	14	162	154	16
rs10050268	4	159.225	155549354	153	23	29	141
rs6536052	4	159.64	155914675	171	5	64	106
rs2011741	4	160.254	156299620	171	5	46	124
rs6536096	4	161.08	156745915	167	9	58	112
rs4259017	4	161.453	157050382	19	157	150	20
rs13124827	4	161.787	157340210	8	168	89	81
rs6817594	4	162.548	158305977	12	164	113	57
rs11100128	4	162.844	158620303	9	167	142	28
rs1928267	4	163.332	159142563	31	145	139	31
rs12505765	4	163.617	159544076	155	21	22	148
rs2348164	4	163.982	160341351	48	128	162	8
rs11725207	4	164.694	161064449	5	171	135	35
rs6849777	4	165.2	161765597	150	26	39	131
rs6826847	4	165.701	162230375	123	53	44	126
rs11733078	4	166.246	162657187	5	171	130	40
rs28750093	4	166.617	163182059	113	63	1	169
rs13106852	4	167.591	163948955	13	163	115	55
rs4411939	4	168.135	164288538	23	153	132	38
rs35207061	4	168.516	164613012	3	173	82	88
rs28564259	4	168.804	164889801	78	98	1	169
rs6829588	4	169.06	165221971	148	28	18	152
rs6842082	4	169.879	165701031	143	33	3	167
rs72699566	4	170.532	166092131	1	175	101	69
rs7667026	4	170.832	166449915	147	29	6	164
rs72697388	4	171.485	166984171	171	5	62	108
rs60954953	4	171.942	167453206	120	56	14	156
rs7698485	4	172.34	167760175	3	173	85	85
rs17601569	4	172.729	168308124	6	170	83	87
rs730741	4	173.071	168610140	4	172	97	73
rs1873134	4	173.728	169378715	3	173	60	110
rs7439293	4	174.512	169677486	9	167	102	68
rs7693982	4	174.976	169969166	7	169	135	35
rs13122912	4	175.572	170676328	31	145	139	31
rs6823836	4	176.014	170933159	170	6	65	105
rs28588588	4	176.571	171740591	158	18	14	156
rs13121311	4	176.838	172204876	146	30	39	131
rs6553587	4	177.141	172608425	168	8	17	153
rs34451479	4	177.601	172935322	96	80	4	166
rs4696030	4	177.987	173747414	27	149	146	24
rs6825703	4	178.438	174210358	5	171	105	65
rs4695857	4	178.949	174502457	24	152	124	46
rs11945461	4	179.683	174858500	5	171	126	44
rs17291087	4	180.457	175151044	10	166	66	104
rs7686453	4	180.901	175585803	147	29	17	153
rs6826366	4	181.173	175846110	101	75	18	152
rs1479378	4	181.464	176096275	46	130	143	27
rs10461336	4	181.885	176391372	21	155	164	6
rs13144028	4	182.675	176832164	5	171	138	32
rs11943356	4	183.447	177332241	4	172	128	42
rs2171083	4	184.04	177628992	14	162	153	17
rs6821735	4	184.718	178153009	7	169	128	42
rs1920974	4	185.58	178460433	78	98	169	1
rs11732838	4	185.899	178748145	24	152	150	20
rs6552275	4	186.327	179009622	22	154	125	45
rs12233819	4	186.964	179499759	5	171	101	69
rs2378969	4	187.805	179997541	5	171	115	55
rs2716776	4	188.565	180484846	57	119	161	9
rs13121934	4	189.027	180774392	11	165	61	109
rs13114874	4	189.411	181047537	11	165	131	39
rs2871151	4	190.079	181316069	33	143	101	69
rs2546275	4	190.617	181567271	22	154	127	43
rs6832052	4	191.697	182066471	61	115	161	9
rs981848	4	192.534	182399545	4	172	78	92
rs4579168	4	193.137	182693892	3	173	81	89
rs12645288	4	193.897	182975074	3	173	116	54
rs1949351	4	194.779	183261250	4	172	81	89
rs7670420	4	195.357	183528129	34	142	158	12
rs7677967	4	196.689	183811132	136	40	32	138
rs13123035	4	197.658	184359915	18	158	136	34
rs6834333	4	199.318	184852809	11	165	154	16
rs7656027	4	200.077	185112274	81	95	143	27
rs28395270	4	200.902	185366849	6	170	114	56
rs10471180	4	201.44	185728811	102	74	1	169
rs6844558	4	202.44	185981436	153	23	10	160
rs7691485	4	203.492	186448476	18	158	153	17
rs6552930	4	204.86	186793518	92	84	12	158
rs9312345	4	205.825	187091644	148	28	10	160
rs1839746	4	206.435	187376559	46	130	141	29
rs6816859	4	207.208	187650634	131	45	12	158
rs1906290	4	208.297	188027629	29	147	150	20
rs954456	4	208.925	188466109	23	153	143	27
rs4518306	4	209.521	188784610	8	168	104	66
rs11935397	4	210.27	189056125	17	159	118	52
rs2010907	4	211.514	189540683	25	151	129	41
rs10005103	4	212.067	189821794	123	53	166	4
rs6816376	4	212.912	190122349	34	142	132	38
rs72716863	4	213.196	190465190	4	172	67	103
rs2685820	4	214.503	190758884	23	153	147	23
rs6555228	5	0.206792	389661	152	24	33	137
rs59382685	5	0.456812	640246	45	131	7	163
rs920980	5	0.775632	896983	158	18	13	157
rs4975596	5	1.2837	1189347	14	162	133	37
rs73033830	5	2.27098	1514830	101	75	1	169
rs3776148	5	2.85087	1804180	2	174	92	78
rs11133938	5	4.10318	2210784	54	122	137	33
rs3112408	5	5.16085	2516934	171	5	30	140
rs1565807	5	6.90219	2965167	129	47	9	161
rs62338519	5	8.32198	3305547	7	169	106	64
rs62335648	5	9.19271	3680334	4	172	109	61
rs11134027	5	10.0732	3992794	7	169	106	64
rs1433270	5	11.2594	4455017	80	96	169	1
rs816463	5	12.1683	4872780	164	12	25	145
rs10078523	5	13.8212	5341822	96	80	1	169
rs4143541	5	14.6926	5725162	136	40	5	165
rs248669	5	15.5009	6054621	16	160	105	65
rs7712952	5	16.4026	6483942	151	25	17	153
rs275438	5	17.0821	6881857	29	147	114	56
rs11134209	5	17.7321	7271164	46	130	133	37
rs4702474	5	18.0353	7528886	64	112	162	8
rs10041150	5	18.6699	7988772	77	99	161	9
rs12653627	5	19.3964	8393159	23	153	122	48
rs4702595	5	20.1144	8861631	30	146	138	32
rs40680	5	20.8314	9203989	24	152	149	21
rs41462	5	21.8896	9619936	132	44	55	115
rs2963894	5	22.409	9877169	27	149	132	38
rs6892396	5	23.6125	10333138	13	163	128	42
rs10035299	5	24.4335	10612627	22	154	131	39
rs17789143	5	25.0644	10900935	6	170	84	86
rs1990003	5	25.5526	11159657	9	167	115	55
rs31899	5	26.3525	11429782	136	40	15	155
rs13357360	5	26.7784	11706034	133	43	5	165
rs13163249	5	27.3047	12785191	11	165	144	26
rs2676233	5	27.9172	13640617	151	25	37	133
rs163832	5	28.5573	14051777	128	48	18	152
rs32529	5	29.0369	14478324	170	6	38	132
rs152363	5	29.4809	14756567	119	57	29	141
rs9688328	5	30.3387	15024160	92	84	29	141
rs257742	5	30.5945	15853255	5	171	104	66
rs1871171	5	31.0782	16285704	5	171	94	76
rs991963	5	31.3447	16549277	6	170	71	99
rs10059183	5	32.833	16975191	111	65	4	166
rs871722	5	33.8645	17437494	9	167	132	38
rs17710639	5	34.2947	17808002	8	168	109	61
rs10454841	5	34.8648	18389151	31	145	159	11
rs1393138	5	35.1279	18790732	151	25	78	92
rs62350862	5	35.658	19069979	11	165	105	65
rs6451429	5	36.1034	19771834	17	159	152	18
rs12514159	5	36.4787	20419469	7	169	78	92
rs4866265	5	36.941	21206584	4	172	92	78
rs7444901	5	37.4115	21849198	13	163	131	39
rs13156017	5	37.7195	22250420	7	169	83	87
rs1995264	5	38.1526	23138951	167	9	71	99
rs12153202	5	38.7425	23533746	9	167	124	46
rs11953215	5	39.3745	24461650	3	173	111	59
rs1966590	5	39.7399	24779565	149	27	13	157
rs2873911	5	40.3269	25030161	8	168	78	92
rs72747069	5	40.792	25752251	27	149	116	54
rs10061914	5	41.2714	26310776	120	56	3	167
rs4382126	5	41.6875	26592656	127	49	25	145
rs4318742	5	42.1091	26960185	42	134	147	23
rs4367265	5	42.5014	27432606	133	43	7	163
rs11743434	5	43.1922	28214776	21	155	133	37
rs2548001	5	43.6382	28787380	169	7	86	84
rs1463422	5	44.1954	29690798	19	157	110	60
rs62357330	5	44.7223	30413808	6	170	65	105
rs1436969	5	44.9747	30689900	18	158	112	58
rs1276177	5	45.3543	30946644	165	11	60	110
rs10755250	5	45.8974	31231102	57	119	160	10
rs12515221	5	46.3555	31481461	41	135	156	14
rs7714189	5	47.2344	31750346	161	15	39	131
rs4867100	5	48.7672	32007713	140	36	13	157
rs34085561	5	49.245	32412535	11	165	57	113
rs35957559	5	49.6635	32667668	5	171	104	66
rs10064448	5	50.3503	33128594	127	49	15	155
rs29968	5	50.6726	33547787	161	15	44	126
rs35397	5	51.7785	33951116	5	171	162	8
rs4626316	5	52.0969	34278426	54	122	168	2
rs7704404	5	52.5778	34591473	135	41	25	145
rs35176895	5	53.2913	34930387	2	174	81	89
rs6451194	5	53.7791	35315483	158	18	112	58
rs4869623	5	54.0299	35772315	166	10	59	111
rs6884019	5	54.3815	36252794	32	144	167	3
rs930072	5	55.2491	36666071	8	168	151	19
rs2972939	5	55.5792	37742406	26	150	157	13
rs10941388	5	56.7753	38241901	17	159	155	15
rs1428498	5	57.8181	38698659	159	17	38	132
rs3866451	5	58.7141	39210912	24	152	140	30
rs2368096	5	59.0479	39569965	20	156	94	76
rs6883840	5	59.359	40286410	146	30	32	138
rs316739	5	60.1048	41644886	119	57	9	161
rs6451722	5	60.575	43711378	162	14	37	133
rs75651719	5	60.8623	45009500	99	77	1	169
rs11741572	5	61.4025	51368985	9	167	95	75
rs351935	5	61.7487	52005409	25	151	134	36
rs16876270	5	62.2747	52258351	20	156	5	165
rs34737247	5	62.5569	52674334	2	174	79	91
rs696195	5	62.9244	53326381	4	172	80	90
rs3111652	5	63.4191	53690669	35	141	168	2
rs4074332	5	64.2751	54141187	30	146	159	11
rs13172161	5	64.8588	54895204	20	156	112	58
rs4700419	5	65.5035	55479979	158	18	16	154
rs154251	5	66.171	55827558	9	167	91	79
rs832552	5	66.7256	56113850	7	169	113	57
rs35939728	5	67.3439	56710408	17	159	126	44
rs11742166	5	67.8471	56974635	39	137	127	43
rs6897592	5	68.2757	57428069	164	12	87	83
rs55868735	5	68.9968	58176914	16	160	91	79
rs153961	5	69.3125	58515074	160	16	68	102
rs10059859	5	69.7698	59231307	160	16	15	155
rs4133470	5	70.0698	59818246	166	10	46	124
rs56257445	5	70.3652	60909926	10	166	88	82
rs1105682	5	70.8436	61161410	165	11	37	133
rs5021974	5	71.3675	62411429	121	55	10	160
rs12332306	5	71.7846	63111148	148	28	43	127
rs6885147	5	72.3236	64448670	120	56	11	159
rs10096	5	72.627	65120144	152	24	43	127
rs2968192	5	73.1409	65616596	171	5	89	81
rs4700140	5	73.6137	65923428	170	6	97	73
rs16895983	5	73.9018	66227725	73	103	10	160
rs1697142	5	74.6243	66495847	174	2	68	102
rs35579160	5	75.1576	67083327	168	8	56	114
rs281445	5	75.735	67350940	152	24	59	111
rs7707989	5	76.2592	67691880	41	135	143	27
rs1687503	5	76.7775	68003767	61	115	168	2
rs6866817	5	77.3466	68595227	44	132	159	11
rs13168712	5	78.6966	70679626	13	163	115	55
rs2320165	5	78.9899	71006411	159	17	85	85
rs1217824	5	79.565	71260673	171	5	68	102
rs9293283	5	80.013	71667829	135	41	14	156
rs17164422	5	80.2695	71918678	154	22	34	136
rs7700369	5	81.1041	72675906	171	5	25	145
rs13357495	5	81.4487	73085666	126	50	4	166
rs6868962	5	82.134	73355631	123	53	21	149
rs1428558	5	83.3857	73851778	165	11	56	114
rs9686818	5	83.9432	74193859	160	16	44	126
rs57131074	5	84.479	75147855	154	22	17	153
rs889189	5	84.9203	75423685	158	18	56	114
rs4296785	5	85.5391	75710783	164	12	38	132
rs7712957	5	86.5728	76138696	139	37	22	148
rs2972341	5	87.3988	76468843	174	2	86	84
rs7729808	5	87.7777	76849531	129	47	24	146
rs34915710	5	88.177	77125991	164	12	56	114
rs10074125	5	88.9076	77625504	4	172	98	72
rs67145712	5	89.8225	78105087	118	58	12	158
rs1644004	5	90.3552	78359036	8	168	84	86
rs6453468	5	90.6224	78938315	165	11	54	116
rs6883826	5	91.439	79191390	172	4	122	48
rs4447967	5	92.0128	79472714	141	35	48	122
rs185105	5	92.3935	79870727	8	168	100	70
rs11952133	5	92.8468	80471121	28	148	126	44
rs6866156	5	93.4153	80746328	161	15	60	110
rs59276096	5	93.7765	81561593	143	33	27	143
rs10474055	5	94.0613	81910293	150	26	51	119
rs27363	5	95.1965	82336762	5	171	87	83
rs28899	5	95.5477	82763083	165	11	42	128
rs35165854	5	96.1159	83068535	5	171	52	118
rs4590163	5	96.4699	83368290	143	33	26	144
rs9293385	5	97.2386	84061542	169	7	60	110
rs13167818	5	97.5589	84381261	3	173	69	101
rs423047	5	97.8347	84895091	3	173	61	109
rs2964881	5	98.1411	85673421	164	12	35	135
rs2929617	5	98.5373	86331061	125	51	2	168
rs13168787	5	98.974	87437079	4	172	119	51
rs301721	5	99.2655	88233749	141	35	8	162
rs2950049	5	100.127	89480000	19	157	151	19
rs2438362	5	100.46	90090791	161	15	28	142
rs2367292	5	100.894	90556785	8	168	140	30
rs9293575	5	101.158	91085026	173	3	58	112
rs60312980	5	101.425	91840637	140	36	12	158
rs6894448	5	102.214	92677720	108	68	5	165
rs153898	5	102.717	94188622	13	163	117	53
rs251076	5	103.158	94509008	8	168	93	77
rs13162779	5	103.516	94937890	17	159	115	55
rs10071657	5	104.361	95830127	4	172	80	90
rs39597	5	105.087	96484131	15	161	129	41
rs6894105	5	105.385	96916431	161	15	62	108
rs2352069	5	105.664	97296147	171	5	74	96
rs6596743	5	105.993	97678524	112	64	6	164
rs6594346	5	106.428	98667229	173	3	86	84
rs12109326	5	106.831	99514447	122	54	19	151
rs6596055	5	107.243	100968503	164	12	8	162
rs7711773	5	107.796	102729864	121	55	27	143
rs73191275	5	108.536	103096509	116	60	1	169
rs12188101	5	108.964	103660893	6	170	86	84
rs7719837	5	109.448	104826962	50	126	155	15
rs10060695	5	109.842	105673428	17	159	100	70
rs13359925	5	110.294	106005425	101	75	4	166
rs56255936	5	110.648	106566107	168	8	84	86
rs163889	5	111.475	106876045	146	30	21	149
rs6869199	5	111.848	107132694	144	32	49	121
rs10077222	5	112.417	107931456	110	66	4	166
rs11960274	5	112.834	108560150	76	100	1	169
rs60240456	5	113.136	108816195	161	15	30	140
rs4601083	5	114.056	109574202	165	11	32	138
rs6594492	5	114.384	110355405	171	5	19	151
rs115192	5	115.077	110919711	163	13	43	127
rs30340	5	115.33	111410316	12	164	102	68
rs163454	5	115.609	111871292	8	168	121	49
rs2546112	5	116.087	112183157	5	171	94	76
rs509237	5	116.373	112550247	5	171	131	39
rs1552453	5	117.044	113339698	51	125	142	28
rs985525	5	117.435	113858286	5	171	72	98
rs6594879	5	117.7	114500737	171	5	65	105
rs6895553	5	118.178	114821667	91	85	12	158
rs249490	5	118.64	115131150	36	140	135	35
rs12654321	5	119.067	115573629	16	160	132	38
rs254232	5	119.697	115887109	9	167	103	67
rs12515487	5	120.275	116186158	163	13	53	117
rs7714476	5	121.381	116553560	168	8	57	113
rs7445113	5	121.758	117039918	12	164	155	15
rs7721999	5	122.181	117496646	173	3	97	73
rs1429726	5	122.566	117915528	172	4	59	111
rs73239055	5	122.843	118252462	126	50	8	162
rs6888446	5	123.514	119444346	164	12	17	153
rs300957	5	123.83	119856511	17	159	135	35
rs72791280	5	124.733	120919338	8	168	89	81
rs6595327	5	125.22	121182514	169	7	41	129
rs12518644	5	125.751	121530987	103	73	2	168
rs10519707	5	126.032	121871938	166	10	59	111
rs1366337	5	126.722	122629266	130	46	23	147
rs153880	5	126.974	123170153	148	28	36	134
rs10063821	5	127.42	123535438	163	13	34	136
rs59546490	5	128.261	123905029	142	34	39	131
rs6869617	5	129.079	124361588	172	4	40	130
rs11740072	5	129.702	124635329	22	154	98	72
rs2546451	5	130.19	125098296	44	132	144	26
rs10035539	5	130.569	125443261	94	82	1	169
rs28577201	5	131.644	125938263	170	6	36	134
rs6894083	5	132.022	126541479	137	39	28	142
rs3906535	5	132.387	126944113	89	87	1	169
rs1478446	5	132.814	127571899	141	35	2	168
rs1990000	5	133.611	128750334	156	20	30	140
rs11242069	5	134.087	130598318	171	5	41	129
rs7717322	5	134.455	132074890	163	13	18	152
rs2241583	5	134.911	132561277	171	5	48	122
rs246961	5	135.6	132811978	151	25	29	141
rs1614413	5	136.264	133133122	13	163	97	73
rs192167	5	136.848	133439635	5	171	91	79
rs7727292	5	137.123	134169772	138	38	51	119
rs6596204	5	137.425	134529443	122	54	2	168
rs758459	5	138.223	134872704	144	32	19	151
rs4976498	5	138.606	135185867	17	159	106	64
rs346652	5	139.15	135727158	27	149	90	80
rs12153513	5	139.444	136294407	14	162	125	45
rs11950275	5	140.114	136961171	9	167	93	77
rs6596446	5	140.368	137980855	150	26	63	107
rs355160	5	140.742	138953589	169	7	45	125
rs264347	5	141.237	139360590	158	18	75	95
rs2910340	5	141.709	140634996	131	45	22	148
rs248617	5	142.084	141092669	173	3	121	49
rs1898679	5	142.908	141391024	3	173	73	97
rs9324876	5	143.507	141706638	161	15	62	108
rs7712868	5	144.677	142122418	174	2	14	156
rs1370982	5	145.097	142381084	6	170	118	52
rs6880439	5	146.057	142868412	97	79	7	163
rs6895003	5	146.507	143220058	171	5	88	82
rs11167849	5	146.828	143583909	5	171	74	96
rs13169495	5	147.22	144625079	91	85	3	167
rs6883434	5	147.543	145039897	140	36	10	160
rs73310116	5	148.058	145305788	32	144	7	163
[truncated: 3,996 more rows]
